Mann M., et al, (2021).

1

1 Quantification of new and archived *Diaphorina citri* transcriptome data using a chromosomal  
2 length *D. citri* genome assembly reveals the vector's tissue-specific transcriptional response to  
3 citrus greening disease

4

5 Marina Mann<sup>1</sup>, Surya Saha<sup>2,8</sup>, Joseph M. Cicero<sup>3</sup>, Marco Pitino<sup>4</sup>, Kathy Moulton<sup>5</sup>, Lilianna  
6 Cano<sup>6</sup>, Wayne B. Hunter<sup>5</sup>, Lukas A. Mueller<sup>2</sup>, Michelle Heck<sup>1,7\*</sup>

7

8 <sup>1</sup>Plant Pathology and Plant-Microbe Biology Section, School of Integrative Plant Science,  
9 Cornell University, Ithaca, NY 14853, USA

10 <sup>2</sup>Boyce Thompson Institute, Ithaca, NY 14853, USA

11 <sup>3</sup>School of Plant Sciences, University of Arizona, Tucson, AZ 85721 USA

12 <sup>4</sup>Indian River Research and Education Center, Fort Pierce, FL 34945 USA

13 <sup>5</sup>U.S. Horticultural Research Laboratory, Unit of Subtropical Insects and Horticulture, USDA  
14 Agricultural Research Service, Fort Pierce, FL 34945, USA

15 <sup>6</sup>AgroSource, Inc. Juniper, FL 33469

16 <sup>7</sup>Emerging Pests and Pathogens Research Unit, Robert W. Holley Center, United States  
17 Department of Agriculture Agricultural Research Service, Ithaca, NY 14853, USA

18 <sup>8</sup>School of Animal and Comparative Biomedical Sciences, 1117 E. Lowell Street, Tucson AZ  
19 85721 USA

20

21 \*To whom correspondence should be addressed:

22 Michelle Heck, michelle.cilia@usda.gov

23

24

## 25 **Abstract:**

### 26 **Background**

27 Huanglongbing (HLB) is the most serious disease of citrus. HLB is caused by the obligate,  
28 intracellular bacterium “*Candidatus Liberibacter asiaticus*” (CLAs). CLAs is transmitted by  
29 *Diaphorina citri*, the Asian citrus psyllid. Development of transmission blocking strategies to  
30 manage HLB relies on knowledge of CLAs-*D. citri* interactions at the molecular level. Prior  
31 transcriptome analyses of CLAs-infected and un-infected *D. citri* point to changes in psyllid  
32 biology due to CLAs-infection. These studies relied on incomplete versions of the *D. citri*  
33 genome, lacked proper host plant controls, and/or were analyzed using different statistical  
34 approaches. Therefore, we used standardized experimental and computational approaches to  
35 identify differentially expressed genes in both CLAs (+) and CLAs (-) *D. citri*. The comparative  
36 analysis utilized the newest chromosomal length *D. citri* genome assembly Diaci\_v3. In this  
37 work, we present a quantitative transcriptome analysis of excised heads, salivary glands, midguts  
38 and bacteriomes from CLAs (+) and CLAs (-) insects.

### 39 **Results**

40 Each organ had unique transcriptome profiles and responses to CLAs infection. Though most  
41 psyllids were infected with CLAs, CLAs-derived transcripts were not detected in all organs. By  
42 analyzing the midgut dataset using both the Diaci\_v1.1 and v3.0 *D. citri* genomes, we showed  
43 that improved genome assembly led to significant and quantifiable differences in RNAseq data  
44 interpretation.

### 45 **Conclusions**

46 Our results support the hypothesis that future transcriptome studies on circulative, vector-borne  
47 pathogens should be conducted at the tissue specific level using complete, chromosomal-length

48 genome assemblies for the most accurate understanding of pathogen-induced changes in vector  
49 gene expression.

50

## 51 **Keywords**

52 *Diaphorina citri*, Huanglongbing, *Candidatus Liberibacter asiaticus*, transcriptomics, citrus,  
53 vector-pathogen interactions

54

## 55 **Background**

56 Huanglongbing (HLB), also known as citrus greening, is the most serious disease of  
57 citrus (reviewed in [1-3]). HLB symptoms include leaves with blotchy chlorotic mottling,  
58 stunting, loss of root biomass, premature fruit drop, uneven fruit development, and ultimately  
59 tree death. HLB is associated with plant vascular tissue infection by the gram-negative,  
60 uncultivable alpha-proteobacteria “*Candidatus Liberibacter asiaticus*” (CLAs), “*Ca. L.*  
61 *americanus*” (CLam) and “*Ca. L. africanus*” (CLaf). The Asian citrus psyllid *Diaphorina citri*  
62 Kuwayama (Hemiptera: Liviidae) is the vector of CLAs and CLam, whereas the African citrus  
63 psyllid *Trioza erytreae* (Del Guercio) is the vector of CLaf. HLB is found in most regions where  
64 citrus is cultivated, including in the United States where it has decimated a multi-billion dollar  
65 industry in Florida and is threatening the industries in Texas and California [4]. HLB affects all  
66 genotypes of *Citrus* and some other members of Rutaceae. Liberibacter, like other vascular plant  
67 pathogens, are also readily transmitted from plant to plant by grafting [5, 6], a technique which  
68 puts phloem from the vascular tissue of one plant into contact with that of another. However,  
69 psyllid transmission remains the primary driver of HLB epidemiology in citrus groves.

70 Evidence thus far on CLas transmission by *D. citri* is consistent with a circulative,  
71 propagative transmission mode that is inextricably linked to the insect's development and  
72 intracellular environment surrounding CLas bacteria (**Figure 1**) [7]. During the circulative  
73 propagative transmission cycle of CLas, *D. citri* acquire CLas from an infected citrus host during  
74 phloem ingestion as early as the 2<sup>nd</sup> nymphal instar [8] but in increasing amounts during the 4<sup>th</sup>  
75 and 5<sup>th</sup> instars of the nymphal stage [9]. The bacteria remain associated with the insect during  
76 molting [9, 10]. CLas circulates throughout the body of *D. citri* until it reaches the salivary gland  
77 tissues, where it replicates to high levels in the adults [11-14]. The titer of CLas increases,  
78 presumably in the salivary gland tissue, over approximately 1-2 weeks [9]. The infected adults  
79 inoculate the bacteria back into the same tree, or in the case of facilitating spread, a different tree  
80 and complete the transmission cycle. CLas can be found in cells of the insect's alimentary canal,  
81 especially the midgut [11, 12, 15]. The bacteria also systemically infect the psyllid during  
82 propagative transmission, including the hemolymph, salivary glands, muscle, fat body and  
83 reproductive organs (reviewed in [3]). Specific cellular receptors in these different *D. citri*  
84 tissues are not known. In adults, CLas forms a biofilm along the midgut and induces apoptosis of  
85 midgut epithelial cells [16], a process which is not observed in nymph midguts [17]. In the  
86 midgut, the bacterium is hypothesized to be associated with the endoplasmic reticulum based on  
87 microscopic observations [18].

88 Not all psyllids become infected with CLas when feeding on CLas-infected trees, and not  
89 all psyllids transmit efficiently even if infected [10, 19, 20]. Such variability has undoubtedly  
90 hampered the ability to disentangle transcriptomic and proteomic responses in psyllids from the  
91 effects of CLas directly or indirectly, and from the effect of CLas-infected trees. Additionally,  
92 different psyllid populations vary in their ability to acquire and transmit the bacterium [10].

93 These variable acquisition and transmission rate efficiencies are heritable traits in *D. citri*,  
94 supporting the idea that *D. citri* genes and proteins at least partially regulate the ability to  
95 transmit CLAs. Due to the variability in *D. citri* infection with CLAs, in ‘omics and systems  
96 biology studies on *D. citri* when measurements are based on responses of hundreds or thousands  
97 of pooled insects or insect tissues, insects reared on CLAs-infected trees are referred to as “CLAs-  
98 exposed insects” or “CLAs-infected” and *D. citri* reared on healthy citrus as “non-exposed” or  
99 “non-infected”. Other papers referred to these groups of insects more generally as CLAs (+) and  
100 CLAs (-) insects to denote the infection state of the insect population as a whole, since not all  
101 individuals reared on an infected tree will become infected with CLAs. This paper will use the  
102 CLAs (+) and CLAs (-) designation to refer to the different sample groups, where the CLAs (+)  
103 insects were reared on CLAs-infected trees and the CLAs (-) insects were reared on healthy citrus  
104 which also tested negative for CLAs by quantitative PCR (qPCR).

105 *D. citri* harbors three bacterial symbionts, “*Candidatus Proffotella armatura*,” “*Candidatus*  
106 *Carsonella ruddii*,” and *Wolbachia-Diaphorina* (wDi) [21-27] which reside in a specialized  
107 organ referred to as the bacteriome. The bacteriome is comprised of bacteriocytes – psyllid cells  
108 densely packed with the endosymbiotic bacteria. The bacteriome of *D. citri* has a precise and  
109 elegant cellular organization that has been described using fluorescence microscopy [21, 25].  
110 *Carsonella* resides in the outer bacteriocytes and *Proffotella* resides in the internal syncytial  
111 cytoplasm of the bacteriome. The function of these beneficial bacterial symbionts in the biology  
112 of *D. citri* is inferred from bacterial genome sequencing, proteomics and metabolite data.  
113 Evidence shows that these symbionts have complex and possibly shared, coordinated metabolic  
114 and protein signaling networks with CLAs [28, 29]. While no direct evidence exists to support a  
115 role for the bacterial symbionts in CLAs acquisition and transmission, *Proffotella* has been shown

116 to modulate production of diaphorin, a polyketide encoded in the *Profftella* genome, in response  
117 to CLas [29, 30].

118         Rapid advances in genome sequencing technologies have paved the way to a deeper  
119 understanding of vector biology over the past decade, including in the analysis of the *D. citri*  
120 genome sequence [23, 31-34]. The short read-based assembly, Diaci\_v1.1 [33, 35], has been  
121 foundational to the vast majority of published research on *D. citri* to date, including the newest  
122 chromosomal length reference genome [34], which is expected to lend more reliability and  
123 contain more cohesive, full-length annotated gene models. Numerous studies have used these  
124 valuable *D. citri* genome sequencing resources to investigate interactions between *D. citri* and  
125 CLas and *D. citri* biology at the transcriptome and proteome levels [15, 29, 36-38]. Wu and  
126 colleagues [39] published a thorough RNAseq experiment including an analysis of organs, sexes,  
127 and life stages of *D. citri*. Their analysis focused on potential insecticide detoxification genes  
128 from CLas (-) insects raised on a close relative of citrus known to be resistant to systemic  
129 infection by CLas, *Murraya exotica*, but did not address the impact of CLas infection in these  
130 organs. A year later, the same group published a paired transcriptome-proteome paper focusing  
131 on CLas (-) *D. citri* salivary glands and associated salivary secretions [40]. They focused on  
132 identifying bioactive molecules from the saliva and salivary gland ‘omics analysis and discussed  
133 proteins that were found uniquely in the salivary glands from *D. citri* reared on healthy plants.

134         Tissue-specific omics analyses enables a molecular snapshot of CLas-*D. citri* interactions  
135 within specific tissues known to be colonized by CLas in the insect. Studies have revealed stark  
136 differences in patterns of expression when comparing tissue-specific responses to whole body  
137 responses [15, 38]. However, earlier studies were limited in the interpretation of the data because  
138 of the incomplete nature of the *D. citri* genome that were used as a backbone for the quantitative

139 analysis and the application of different computational workflows to identify differentially  
140 expressed genes. Kruse et al. (2016) did a thorough analysis and discussed the midgut  
141 transcriptomics responses to CLas using four biological replicates of pools of hundreds of  
142 midguts and performed dual differential expression analysis using two types of computational  
143 biology tools, edgeR and DESeq2, to reduce the false discovery rates [15]. However, the results  
144 were dependent on paired proteomics and transcriptomics that were both aligned to the relatively  
145 low quality and incomplete v1.1 *D. citri* genome, the assembly available at the time. Yu and  
146 colleagues [41] built on the Kruse et al. study [15] using the *D. citri* v2.0 genome, which also  
147 lacked the Hi-C scaffolding included in the newest v3.0 genome. Despite the limitations of the  
148 genome sequences used for the analyses of these transcriptomes, the results clearly showed that  
149 CLas has different effects on metabolic pathways expressed within different tissues of *D. citri*.  
150 To understand the nature of the CLas-*D. citri* relationship at the molecular level, a holistic  
151 approach which both integrates the responses across different tissues involved in the circulative  
152 transmission pathway and quantifies the impact of CLas infection on the transcriptional  
153 regulation within specific tissues is necessary.

154 In this work, we compare CLas (-) to CLas (+) psyllid datasets from four different  
155 organs: excised *D. citri* midguts, bacteriomes, salivary glands, and heads, using the newest *D.*  
156 *citri* genome assembly (v3.0), which includes chromosomal length scaffolds [34]. This study  
157 advances our understanding of *D. citri*-CLas interactions because it integrates an analysis of new  
158 transcriptome data with previously published transcriptome data to show the impact of CLas on  
159 the transcriptional landscape of *D. citri* organs involved in the circulative, propagative  
160 transmission. The difficulties of comparing the four datasets – three of which were collected  
161 from separate insect colonies, at different times, sequenced separately, stored in freezers for

162 different lengths of time, and contain variable amounts of CLAs in each tissue type – should be  
163 acknowledged. This study does not purport to have controlled for all differences found between  
164 these datasets, but we do attempt to carefully explain results within the bounds of our controls  
165 and include caveats for the confounding effects. Our analysis demonstrates that it is possible to  
166 analyze new ‘omics data in the context of and alongside historical data in public repositories to  
167 maximize the use of existing large-scale dataset resources in discovering new biology. The  
168 results underscore the importance of chromosomal length assemblies of arthropod genomes for  
169 accurate interpretation of gene expression.

170

171 Figure 1. Schematic of *Diaphorina citri* on a citrus leaf, showing the anatomical location and  
172 physical details of four parts that were extracted from adult *D. citri* to create four datasets (gut -  
173 green, bacteriome - yellow, salivary gland - blue, head – dark purple). The circulative  
174 transmission of “*Candidatus Liberibacter asiaticus*” (CLAs represented by small grey lines) is  
175 represented as CLAs travels from leaf veins through the gut, crossing the midgut epithelial cell  
176 layer to circulate in the body of *D. citri* where it is known to enter and possibly interact with  
177 many different organs. CLAs enters the salivary gland where it is known by contributory effects  
178 from acquisition by late instar nymphs, to replicate to high levels, at which point it can be  
179 inoculated into the phloem while adult *D. citri* feed (see 3D imaging and digital video by Alba-  
180 Tercedor et al. (2021) for more details [42]). CLAs (-) adults transmit CLAs inefficiently if the  
181 bacteria are acquired during the adult stage.

182

## 183 **Data Description**



184 **Experimental design, RNA collection, and sequencing of four *D. citri* RNA datasets.**

185           Psyllid colonies and citrus plants used to generate samples for the bacteriome, head and  
186 midgut datasets were continuously maintained by the USDA ARS in Ithaca NY and the USDA  
187 ARS in Fort Pierce, FL under the same growth conditions. These psyllid colonies – including  
188 CLas (-) and CLas (+) *Diaphorina citri* adults and nymphs raised on *Citrus medica* (Citron) –  
189 were originally started in 1999 from individuals collected from a farm near Fort Pierce, Florida  
190 and the CLas strain used came with those original individuals. Growth chambers were  
191 maintained at 22.8°C-26.7°C, 70-80% humidity and a 14h light/10h dark photoperiod. Citrus  
192 plants (*Citrus medica*, Citron) were grown in greenhouse conditions from seed. CLas (+) *C.*  
193 *medica* were inoculated using CLas (+) *D. citri*. When insect colonies contained 1-2 week old  
194 adults, pools of adult *D. citri* were collected from each colony to create each biological replicate  
195 (120 per bacteriome and head replicate (Ithaca colony), 150 per salivary gland replicate (Fort  
196 Pierce colony), 250 per midgut replicate (Fort Pierce colony described in [15]). Insects were  
197 anesthetized on ice for a few hours prior to and during dissection.

198 *Bacteriome and head samples.*

199           Using a dissecting scope, bacteriomes and heads of adult psyllids were excised into mili-  
200 Q (MQ)-water then moved to 2ml tubes containing 350ul of buffer RLT (Qiagen RNeasy kit)  
201 with beta-mercaptoethanol and kept on ice during collections. Once the collection of a biological  
202 replicate was complete, the tubes containing pools of psyllid organs were flash frozen in liquid  
203 nitrogen and stored in -80°C until needed. Total RNA was extracted following the Qiagen  
204 RNeasy extraction protocol, including sample disruption with syringes and DNase treatment to  
205 remove DNA contamination.

206 *Salivary glands and midguts.*

207 Salivary tissues and midguts were preserved in TriZol. Salivary glands were excised as  
208 described by Cicero and Brown [43] in pools of 300 per replicate in TRIzol LS (ThermoFisher).  
209 Samples were kept at -80 ° C (bioreps 1-3, CLas (-/+)) were kept 1 year, while replicate 4, both  
210 CLas (-/+), was kept for 2 years) prior to RNA extraction. Total RNA was extracted for both  
211 midguts and salivary glands following the standard TRIzol RNA extraction protocol [44]  
212 including light syringe disruption prior to adding ethanol, and DNase treatment to purify total  
213 RNA. Total RNA quality was tested using an RNA gel prior to library preparation. Details of  
214 midgut sample handling can be found in Kruse et al. [15].

215 Illumina libraries for all samples were made by Polar Genomics LLC following the  
216 protocol of Zhong et al., [45] and included poly-A tailed mRNA enrichment. Libraries were  
217 shipped on dry ice to GENEWIZ where they were pooled for Illumina paired-end 150bp  
218 sequencing. Bacteriome, head and salivary gland samples were sequenced separately from the  
219 previously published midgut samples. Raw data has been uploaded to NCBI and is accessible to  
220 reviewers via BioProject accession # PRJNA385527, submission ID SUB10382129 and will be  
221 made available to the public upon publication.

222

## 223 **Analyses**

224 **Though most psyllids were infected with CLAs, CLAs-derived RNAseq reads were not**  
225 **detected in all organs.**

226 Using quantitative PCR (pPCR) analysis of whole insects, we determined the CLAs  
227 infection rate of the *D. citri* populations used to generate samples of each organ, which informed  
228 our interpretations of differential expression and infection for the subsequent datasets. The CLAs  
229 infection rate was for all samples were derived from sampling whole insects, not dissected

230 organs. Across all sample types, the percent infection rate ranged between 73-85%. Cq values  
231 lower than 40 were counted as CLas (+) (Table 1). In addition to a population-level assessment  
232 of CLas infection, we quantified CLas-mapped reads found within each sample after sequencing  
233 (Table 1 and Figure S1). Read counts mapping to the CLas-psy62 genome (genome produced  
234 from a single psyllid in FL [46]) were significantly detected in CLas (+) salivary gland and head  
235 samples (an average of 1965 and 2681 reads, respectively). This might be influenced by the fact  
236 that only AT-rich transcripts from the CLas-psy62 genome were captured during the poly-A  
237 enrichment step, prior to library prep. Upon closer analysis of the CLas-aligning reads from the  
238 salivary glands, when at least three biological replicates had a transcript with at least one read, 50  
239 different CLas transcripts were represented, with an additional six rRNA transcripts (three of  
240 each 16S and 23S transcripts), for a total of 56 CLas-psy62 transcripts identified. The majority of  
241 CLas reads from the salivary glands aligned to the top 10 transcripts, where the total number of  
242 reads across all biological replicates of each transcript ranged from 80 to 290. Of these top 10,  
243 three were listed as “protein coding” and annotated as figB, figC, and parB, while the rest were  
244 unlabeled/unknown (Table S1). While these numbers are not enough to allow for statistical  
245 analysis, they present an intriguing picture of CLas infection in the organ essential for successful  
246 transmission.

247

248 Table 1. Percent infection by CLas in different *Diaphorina citri* tissues as measured by qPCR,  
249 and the average number of RNAseq reads that aligned to the CLas genome (psy62) from each  
250 dataset.

251

252

| Dataset                     |          | Avg # CLas reads | % Infection <sup>+</sup> |
|-----------------------------|----------|------------------|--------------------------|
| Midgut <sup>1</sup>         | CLas (-) | 1*               | 0                        |
|                             | CLas (+) | 212              | 82%                      |
| Salivary gland <sup>2</sup> | CLas (-) | 0.5              | 0                        |
|                             | CLas (+) | 1965.5           | 73%                      |
| Bacteriome <sup>3</sup>     | CLas (-) | 0.8              | 0                        |
|                             | CLas (+) | 3.4              | 85%                      |
| Head <sup>3</sup>           | CLas (-) | 174.6            | 0                        |
|                             | CLas (+) | 2681.8           | 85%                      |

253 <sup>1</sup> qPCR Cq data from Kruse et al. 2017, reads aligning to CLas are from our own alignments.

254 <sup>2</sup>Salivary glands from a colony with a high (>90%) infection rate.

255 <sup>3</sup>Bacteriomes and heads were taken from the same insects, and whole insects were used for  
256 qPCR of CLas titer, so the average Cq value is the same for both datasets.

257 \*Low read counts could represent sequences from contaminating CLas sequences remaining  
258 within the *D. citri* genome (which need to be removed), or representative of sequences  
259 transferred to *D. citri*, or found in common in other bacterial symbionts present.

260 <sup>+</sup>Cq values of 40 translate to 0 titer of the target bacterium. Cq values are calculated using 20-30  
261 whole body individuals from each parent colony of each dataset. All Cq<40 are counted for  
262 percent infection.

263

264 **Global assessment of four transcriptomics datasets clarifies the *D. citri* organ-specific**

265 **response to CLas.**

266 Across all four datasets, we obtained an average of 27.23 million high-quality reads,  
267 (midguts: 26.43M, salivary glands: 44.98M, bacteriomes: 22.11M, heads: 15.40M), and 71.3%  
268 of the reads aligned concordantly to the v3.0 *D. citri* genome on average (average concordant  
269 alignment in midguts: 74.17%, salivary glands: 73.51%, bacteriomes: 81.12%, heads: 56.43).

270 The head dataset proved to be more variable as compared to the other datasets, recording the  
271 least number of raw reads and the lowest average percent alignment. In contrast, the highest  
272 percent alignment to the *D. citri* genome was recorded by the bacteriome dataset, samples of  
273 which were collected from the same individual insects as the head dataset (Table S2).

274 A principal components analysis (PCA) to examine the sources of variation among the  
275 four *D. citri* dataset expression profiles was performed, where each dataset includes both CLas  
276 (+) and CLas (-) biological replicates. Each organ separated from the other organs in PCA space,

277 showing that each organ has a unique transcriptome profile. The largest source of variation (PC1  
278 = 21%) was explained by differences in the transcriptome profiles of the midgut and bacteriome  
279 as compared to the salivary gland and head (Figure 2). The second largest source of variation  
280 between the four datasets (PC2 = 18%) was explained by differences between the midgut and the  
281 bacteriome datasets, with a smaller amount of variation between those samples and the head and  
282 salivary gland datasets along the same principal component. Importantly, biological replicates of  
283 each dataset clustered together and separately from the others (Figure S2), supporting the  
284 hypothesis that each organ has a unique transcriptomic signature independent of CLas infection.  
285 A closer examination of the four clusters showed that the salivary gland, bacteriome and head  
286 datasets did not differentiate between CLas (-) and CLas (+) biological replicates (Figure S2B,  
287 S2C, S2D), while midguts (Figure S2A) showed a clear separation along PC1 between CLas (-)  
288 and CLas (+) biological replicates.

289 PCA plots of each organ dataset comparing CLas (+) to CLas (-), revealed other sources  
290 of variation (Figure S2). The variance described by PC1 of the salivary gland dataset (44.1%,  
291 Figure S2B) was due to two samples which were kept in the -80C freezer and then sequenced a  
292 year after the other six samples, while PC2 (19%, Figure S2B) represented the effect of CLas  
293 infection which is not distinct, except for the two outlier samples. The bacteriome dataset (Figure  
294 S2C) showed some separation between CLas (+) and CLas (-) biological replicates (PC2=15.9%)  
295 but the majority of variation was due to variance among individual biological replicates  
296 (PC1=16.7%). The head dataset (Figure S2D) showed similar variation across all samples as the  
297 bacteriome dataset. This variation explained both the first and second major sources of variance  
298 (PC1=39.7%, PC2=27.3%) with no obvious distinctions between CLas (+) and CLas (-)  
299 biological replicates.

300

301

302 **Figure 2:** Principal components analysis (PCA) of four *Diaphorina citri* mRNAseq datasets  
303 (head, midgut, salivary gland and bacteriome), each composed of CLas (+) and CLas (-)  
304 biological replicates, showing the two main sources of variation among them. PC1 (21%)  
305 separates samples containing salivary tissues (head and salivary gland samples) from the other  
306 datasets, while PC2 (18%) distinguishes the bacteriome and head datasets (which were collected  
307 in parallel from the same individual insects), from the salivary gland and midgut datasets (which  
308 were collected independently). Within each dataset, there is little to no clear separation between  
309 CLas (+) and CLas (-) biological replicates. The remaining variance in the data, (61%) is  
310 explained by other factors in the data. Raw read counts were processed by DESeq2 using the  
311 Benjamini-Hochberg normalization method before generating the principal components plot.

312

313 **Gene expression signatures in response to CLas infection are tissue-specific in *D. citri*.**

314 The total number of differentially expressed transcripts (including both the transcripts  
315 that were only expressed in CLas (+) or CLas (-) replicates, and the transcripts that were present  
316 but differentially expressed between CLas(+) and CLas(-) biological replicates) was determined  
317 using the maximum adjusted p-value of 0.05, yielding significantly differentially expressed  
318 transcripts in each dataset (midgut=277, salivary gland=107, bacteriome=296, head=10). From  
319 these top transcripts, those with a Log2FoldChange (L2FC) of  $>|2|$  were used for downstream  
320 analyses. This strict quality and DE threshold limited the number of final transcripts to a small  
321 number (midgut=196, salivary gland=105, bacteriome=113, head=10) (see Tables S3, S4, S5,  
322 and S6 for the list of transcripts). A skew towards up-regulated transcripts in CLas (+) biological  
323 replicates was detected in all organs (salivary gland: up-regulated=91, down-regulated=14;

324 midgut: up-regulated=129, down-regulated=67; bacteriome: up-regulated=70, down-  
325 regulated=43; head: up-regulated=6, down-regulated=4).

326 Four major groups of transcripts were chosen based on their strong representation among  
327 the top differentially expressed gene (DEG) lists from the salivary gland, bacteriome and midgut  
328 datasets (Figure 3, Table S7) for a more detailed analysis to highlight the tissue-specific patterns  
329 of transcriptional activation in response to CLAs. The four groups include ribosomal transcripts,  
330 immunity-related transcripts, endocytosis-related transcripts and ubiquitination-related transcripts.  
331 Each dataset varies in its strength of response (as measured by L2FC and the relative number of  
332 transcripts found in each of the four categories).

333 Ribosomal transcript depletion in silico is known to reduce the bias of overabundant host  
334 transcripts over secondary target organism transcripts in a dataset [47, 48]. Analysis of ribosomal  
335 RNAs remaining after bioinformatic filtering left only the most highly differentially expressed  
336 rRNA transcripts between CLas (+) and CLas (-) samples. The majority of ribosomal transcripts  
337 are up-regulated in CLas (+) samples. Ubiquitination genes are highly upregulated in the salivary  
338 gland dataset (Figure 3A). Endocytosis genes are highly upregulated in all tissue datasets. In  
339 contrast, immunity genes are upregulated in the salivary glands and midguts but not the  
340 bacteriomes (Figure 3C). Different ribosomal genes are upregulated in all three datasets (Figure  
341 3C).

342

343 Figure 3: Transcripts have unique expressions across different organs of *D. citri*. The top  
344 differentially expressed (DE) transcripts from each dataset (bacteriome, midgut and salivary  
345 gland) are sorted by major functional groups including ubiquitination, endocytosis, immunity and

346 ribosomal-related transcripts. Not all transcripts are statistically DE, one transcript may be DE in  
347 one dataset, but not the others. See Table S7 for specific p-values.

348

349 In addition to the major patterns (Figure 3), selected transcripts of interest also showed  
350 notable changes in expression in the datasets consistent with the functions of these tissues in *D.*  
351 *citri* physiology that may give insight into how CLas is interacting with these specific tissues at  
352 the molecular level. These changes are discussed here.

353

354 **Midgut:** In addition to the organization shown in Figure 3, the top differentially  
355 expressed transcripts from the midgut dataset were manually sorted into five additional  
356 functional categories including biosynthesis and catabolism (n=55, 40 up-regulated in CLas (+),  
357 15 down-regulated), cell structure and signaling (n=66, 38 up, 28 down), stress (n=10, 6 up, 4  
358 down), transport (n=28, 19 up, 9 down), and unknown (n=37, 26 up, 11 down). The full list can  
359 be found in Table S3. Differentially expressed transcripts in the stress category include heat  
360 shock and cold shock protein genes, thioredoxin, and E3 ubiquitin ligase. Three heat shock  
361 proteins (70-A1, 70-B, 70) are up-regulated with exposure to CLas, while the cold shock protein  
362 is down regulated. An E3 ubiquitin ligase, a type IV collagenase and tumor protein p53 are also  
363 up-regulated. A thioredoxin transcript and a HSP20-like chaperone transcript are down-regulated  
364 with exposure to CLas. Transport-related transcripts that are up-regulated with CLas-infection  
365 include two odorant-binding protein transcripts, membrane-associated ion transporters  
366 (aquaporin, major facilitator, protein-coupled AA-transporter, efflux system protein transcript,  
367 phosphate transporter, potassium channel protein transcript, and general secretion pathway  
368 transcripts), a vacuolar-sorting protein transcript, and an intraflagellar transport particle protein



369 transcript, among a few others. Down-regulated transcripts include syntaxin, ubiquinol  
370 cytochrome-c, membrane-associated proteins and transporters, and nuclear transport factor 2.

371 **Salivary gland:** The full list of statistically significant ( $p_{adj} < 0.05$ ) salivary gland  
372 differentially expressed ( $L2FC > |2|$ ) transcripts can be found in Table S4. Transcripts for 40S and  
373 60S subunits of the eukaryotic ribosome are highly up-regulated (40S S15a  $L2FC = 10.12$ , 40S  
374 S28  $L2FC = 10.52$ , 60S  $L2FC = 5.53$ ), as well as six transcripts involved with transportation which  
375 are all up-regulated (ABC transporter C family  $L2FC = 5.95$ , alpha-tocopherol transfer protein  
376  $L2FC = 8.04$ , gamma-glutamylcyclotransferase  $L2FC = 8.15$ , geranylgeranyl transferase  
377  $L2FC = 6.22$ , MFS-type transporter  $L2FC = 4.03$ , and phosphate acetyltransferase  $L2FC = 9.30$ ).  
378 Additionally, four elongation factor (EF) transcripts are highly up-regulated (EF-1b, EF-2, EF-4  
379 and a Calcium-binding EF hand), consistent with increased ribosomal activity. While  
380 ubiquination-related transcripts are present in every dataset, in the salivary gland dataset two  
381 transcripts are highly up-regulated including a ubiquitin conjugating enzyme ( $L2FC = 3.70$ ) and  
382 ubiquitin-ligase E3 ( $L2FC = 4.69$ ). [41].

383 Since the salivary gland is known as a secretory organ, the most abundant transcripts  
384 were checked for both the presence of transmembrane helices (TMHs) and for signal sequences,  
385 the first step towards identifying secreted effectors. A total of 12 candidate *D. citri* secreted  
386 effectors were found: five lack annotation or are otherwise *D. citri*-specific, and four were  
387 predicted to contain a TMH. Of the eight candidate salivary gland effector transcripts without  
388 TMHs, seven are highly up-regulated in CLAs (+) adult *D. citri*, while one of the unknown  
389 transcripts is highly down-regulated in CLAs (+) adult salivary glands. (Table S8). A recent paper  
390 by Wu et al [40] looked closely at salivary proteins and transcripts from CLAs (-) *D. citri*, and of

391 the eight possible effectors identified by this study, only the serine proteases were found in  
392 common.

393 **Bacteriome:** A key group of transcripts likely involved in communication between *D.*  
394 *citri* and its obligate endosymbionts housed in the bacteriome are the transporters,  
395 methyltransferases, acetyltransferases and the PiggyBac transposable elements, which together  
396 are represented in the top DE transcript list by 10 different transcripts. Three methyltransferases  
397 are all highly up-regulated in the CLas (+) adult bacteriome (methyltransferase family protein  
398 L2FC=7.48, phthiotriol dimycocerosates methyltransferase L2FC=5.48, and protein arginine N-  
399 methyltransferase L2FC=2.10) and one acetyltransferase is down-regulated (histone  
400 acetyltransferase catalytic subunit L2FC= -2.17). Five transcripts are annotated as “transporters”  
401 including three that are up-regulated in CLas (+), (cation-chloride cotransporter L2FC=3.07,  
402 cationic amino acid transporter L2FC=8.43, major facilitator transporter L2FC=5.59) and two  
403 that are down-regulated in CLas (+), (ABC transporter G family protein L2FC= -2.13 and  
404 organic solute transporter ostalpha protein L2FC= -2.31). Three ribosomal-related transcripts are  
405 up-regulated in the CLas (+) adult *D. citri* bacteriome (60S L26 with L2FC=4.03, 60S L37a with  
406 L2FC=3.25, and ribosomal protein L23 with L2FC=2.93). The full list of statistically significant  
407 ( $p_{adj} < 0.05$ ) bacteriome differentially expressed ( $L2FC > |2|$ ) transcripts can be found in Table S5.

408 **Head:** The head dataset had relatively few reads sequenced and likewise, very few  
409 transcripts were statistically significantly DE. Of the 10 with  $p_{adj} < 0.05$  and  $L2FC > |2|$ , half ( $n=5$ )  
410 were associated with cell structure and signaling (including a vigilin gene with L2FC=-4.09,  
411 consistent with reports that CLas infection alters vector behavior [49]: a DNA-polymerase gene  
412 with L2FC=-3.42, a Rho-GTPase with L2FC=5.28, a neuromodulin gene with L2FC=5.27, and  
413 an insulin-like growth factor with L2FC=5.63). One transcript was associated with activation of

414 autophagy (“Tumor protein p53-inducible nuclear protein 1” with L2FC=5.61), two with  
415 transport (an ATP synthase subunit gene with L2FC= -5.33, and one with an intracellular protein  
416 transport protein with L2FC= 3.41) and the final two were unknown (Dcitr10g06500.1.1 with  
417 L2FC= 5.56, and Dcitr05g06500.1.1 with L2FC= -4.26). Two overlaps between transcripts  
418 found in the salivary gland and head datasets included RNA-directed DNA polymerase which is  
419 highly down-regulated in CLas (+) adults in both datasets, as well as two ATP-synthase  
420 transcripts, one up-regulated in salivary glands (ATP synthase gamma chain L2FC=2.56), one  
421 down-regulated in heads (ATP synthase delta subunit L2FC= -5.33). The full list of statistically  
422 significant ( $p_{adj}<0.05$ ) differentially expressed ( $L2FC>|2|$ ) head transcripts can be found in  
423 Table S6.

424

#### 425 **Genome improvement leads to quantifiable differences in RNAseq data interpretation.**

426 We hypothesized that due to improvements in the v3.0 *D. citri* genome, integrating across  
427 different datasets for visualization of tissue specific responses may have been successful in part  
428 due to improved transcript quantification. To test this hypothesis, the midgut dataset was used to  
429 compare RNAseq alignment and DE results between the v.1.1 and v.3.0 *D. citri* genome. The  
430 two versions of the *D. citri* genome resulted in different interpretations of the midgut  
431 transcriptomics results. The initial indication of differences between the two genome alignments  
432 was at the individual biological replicate level, where genome v3.0 has a 9% higher overall read  
433 alignment, as well as 3000 fewer *D. citri* transcripts found in each biological replicate, on  
434 average. The improved v3.0 genome changed the quantification of the midgut transcriptome.  
435 After differential expression, fewer statistically significant (adjusted  $p$ -value $<0.05$ ) differentially  
436 expressed transcripts ( $\text{Log}_2\text{FoldChange}>|0.5|$ ) were matched to genome v3.0 than genome v1.1.

437 Percent alignment of cleaned reads was less than 100% in all biological replicates for both  
 438 genomes (Table 2).

439

440 **Table 2:** Comparison of number of raw and trimmed reads from all biological replicates  
 441 analyzed, as well as percent alignment, number of transcripts, and number of up and down  
 442 regulated transcripts from both the v1.1 and v3.0 genome analysis of *D. citri* CLas (+) midguts.

| Raw read cleaning and filtering stats    |                   |                             |                                          |                            |                                |                                |
|------------------------------------------|-------------------|-----------------------------|------------------------------------------|----------------------------|--------------------------------|--------------------------------|
| Midgut samples                           | #raw paired reads | #reads trimmed <sup>1</sup> | %aligned v1.1 <sup>2</sup>               | %aligned v3.0 <sup>2</sup> | #transcripts v1.1 <sup>3</sup> | #transcripts v3.0 <sup>3</sup> |
| CLas(-)_1                                | 27.85M            | 273                         | 64.89                                    | 73.82                      | 17,170                         | 13,814                         |
| CLas(-)_2                                | 28.26M            | 234                         | 68.13                                    | 77.12                      | 15,284                         | 12,481                         |
| CLas(-)_3                                | 26.05M            | 246                         | 66.12                                    | 74.29                      | 17,566                         | 14,142                         |
| CLas(+)_1                                | 26.89M            | 76                          | 64.04                                    | 73.23                      | 16,339                         | 13,281                         |
| CLas(+)_2                                | 27.15M            | 210                         | 62.16                                    | 71.82                      | 16,834                         | 13,641                         |
| CLas(+)_3                                | 22.41M            | 117                         | 64.48                                    | 74.77                      | 16,476                         | 13,230                         |
| <i>D. citri</i> genome v1.1 <sup>4</sup> |                   |                             | <i>D. citri</i> genome v3.0 <sup>4</sup> |                            |                                |                                |
| UP                                       | DOWN              | TOTAL                       | UP                                       | DOWN                       | TOTAL                          |                                |
| 272                                      | 341               | 20,792                      | 176                                      | 303                        | 12,704                         |                                |
| 1.30%                                    | 1.64%             | 100%                        | 1.38%                                    | 2.38%                      | 100%                           |                                |

443 <sup>1</sup>Trimming performed using Trimmomatic to remove adapters and low quality sequences.

444 <sup>2</sup>Alignment of cleaned reads to each genome performed using Hisat2. Quantities of single- and  
 445 multi-aligning concordant reads were added together to calculate percent alignment.

446 <sup>3</sup>Transcripts were counted before differential expression and include only named, annotated Dcitr  
 447 (v3.0) or XM (v1.1) IDs that have 1 or more counts. Not all transcripts are found in all biological  
 448 replicates and not all are found in both CLas(+) and CLas(-).

449 <sup>4</sup>Differential expression performed via Ballgown and DESeq2. Transcripts in “TOTAL” column  
 450 have at least 1 read aligning, while UP and DOWN regulated transcripts have adjusted p-value  
 451 <0.05 and Log2FoldChange>0.5.

452

453 Next, we hypothesized several possible ways the genome assembly could impact the  
 454 interpretation of the transcriptome data (Figure 4A). The orange genome (representing version  
 455 1.1, Figure 4A) is shown in short fragments with variably sized gaps between the lengths. The  
 456 reads from gene 1 (in blue) demonstrate multi-mapping to more than one genomic region, as well  
 457 as non-alignment due to missing genomic sequence. The reads in green from gene 2 demonstrate

458 that reads may align across a gap in the genome, and also that a dataset may not have reads to  
459 cover all the genome, or, alternatively the genomic sequence is such low quality that reads may  
460 not match to it perfectly enough to be counted. The corrected genome from v3.0 (pink) would be  
461 predicted to minimize these spurious mapping occurrences (Figure 4A, v3.0 genome in pink).

462 To test whether these differences between genomes has a measurable effect on  
463 downstream expression analyses, we selected four random, differentially expressed transcripts  
464 (DE in the v3.0 analysis) for an in depth comparison (Figure 4B). As predicted, in all four cases,  
465 the new gene model was longer, and did not contain gaps. In contrast, the associated v1.1 gene  
466 models that matched to the full-length transcript were shorter, comprised of more fragments,  
467 included introns or gaps (Figure 4B), and were described as “PREDICTED” genes. We matched  
468 the read abundance profile over each transcript annotation to demonstrate differences in  
469 alignment frequency.

470

471 Figure 4: A) Predicted differences between the version Diaci\_1.1 and v3.0 *D. citri* genomes. The  
472 genes in blue and green together demonstrate multi-mapping, non-alignment due to missing  
473 genomic sequence, alignment across a gap in the genome, and the genomic sequence is such low  
474 quality that reads may not match to it perfectly enough to be counted, while the updated genome  
475 represented in pink, fixes or reduces these issues. B) Four example transcripts showing  
476 differences in read alignment as a result of differences between the two genome versions. The  
477 pink line represents the newest genome v3.0 while orange represents the older genome, v1.1.  
478 Dotted lines demonstrate read alignment to the transcripts in the case of each genome.

479

480 The transcript expression associated with each of the v1.1 LOC gene IDs which matched  
481 to the sequence from five differentially expressed transcripts from v3.0 (Fig. 4B) were assessed  
482 relative to v3.0 transcript expression. In all cases, the differential expression of the v1.1  
483 transcripts in CLas-exposed relative to healthy was lower and less significant than the expression  
484 of the v3.0 transcripts.

485 **Table 3:** Four statistically significant, differentially expressed genes from v3.0 midgut alignment  
486 were subject to BLAST to find their v1.1 genome equivalent gene IDs, and their total read  
487 counts, adjusted p-values, and Log2FoldChanges are compared.

488

| v3.0 Gene ID      | v3.0 padj <sup>1</sup> | V3.0 Log2FC <sup>2</sup> | v1.1 Gene ID  | v1.1 padj <sup>1</sup> | v1.1 Log2FC <sup>2</sup> |
|-------------------|------------------------|--------------------------|---------------|------------------------|--------------------------|
| Dcitr10g01470.1.1 | 0.00                   | -10.69                   | LOC103515983  | 0.22                   | -1.21                    |
|                   |                        |                          | LOC103515984  | 0.50                   | -0.92                    |
|                   |                        |                          | LOC103518803* | 1.00                   | 0.34                     |
| Dcitr11g09870.1.1 | 0.01                   | -0.511                   | LOC103518620  | 0.14                   | 1.60                     |
| Dcitr13g03130.1.1 | 0.01                   | -0.62                    | LOC103509242  | 0.87                   | -0.21                    |
|                   |                        |                          | LOC103509238  | 0.86                   | -0.43                    |
| Dcitr13g03190.1.1 | 0.01                   | 0.51                     | LOC103513428  | 0.72                   | 0.66                     |
|                   |                        |                          | LOC103509249  | 0.84                   | -0.44                    |
|                   |                        |                          | LOC103509235  | 0.51                   | 0.56                     |
|                   |                        |                          | LOC113471714  | 0.55                   | 0.53                     |

489 <sup>1</sup>Adjusted p-values determined by DESeq2 using Benjamini-Hochberg adjustment of p-values.

490 <sup>2</sup>Log2FoldChange is calculated relative to healthy, so negative values show reduced expression  
491 in CLas (+) samples, while positive values show increased expression in CLas (+) samples.

492 \*Not enough read alignment counts for statistical analysis of differential expression.

493

## 494 Discussion

495 The *D. citri* populations used to generate the samples in this study were all infected with  
496 CLas at different percentages, consistent with what has been reported in the literature for this  
497 pathogen and vector. Additionally, CLas reads were detected at high levels in the salivary gland  
498 and head samples, consistent with previous studies of the salivary glands using qPCR analysis [9,  
499 11, 12]. The relative amount of CLas detected in the salivary gland data suggests that CLas is

500 transcriptionally active, indicative of replication, though the lack of detection of similar numbers  
501 of CLas reads in the bacteriome and midgut does not preclude transcription, but that the levels  
502 may be below the limit of detection in these samples. Since sample RNA was poly-A enriched  
503 using oligos prior to making sequencing libraries, many of the CLas transcripts in samples are  
504 likely excluded, as poly-A tail enrichment biases samples towards eukaryotic mRNAs.

505         Detection of CLas reads in some tissues and not others leads us to revisit the  
506 nomenclature used to describe insects which are sampled from CLas-infected plants. Some  
507 studies, such as this one, designate insect samples as CLas (+) or CLas (-), or healthy or infected  
508 referring to the infection status of the tree used to rear the insect. Alternatively, some studies  
509 label insects (as opposed to the trees) as CLas-exposed or unexposed, the latter when sampled  
510 from healthy, CLas-negative trees. The use of exposed or unexposed is to account for the finding  
511 that not all insects acquire and/or become infected with CLas when reared on CLas-infected trees  
512 [10, 19, 20]. This transcriptomics study suggests that the exposed and unexposed designations  
513 are the most accurate because there is deeper complexity of CLas infection status in each insect  
514 at the level of the organ. In this study, salivary glands appear to have 10x more CLas reads than  
515 found in midguts and even more than in bacteriomes, suggesting salivary glands are truly  
516 “infected” and other organs, such as the bacteriome, remain “exposed”. Tissue specific gene  
517 regulation of vector-pathogen interactions was first described for polioviruses that are  
518 transmitted by aphids [50]. Understanding the genetic basis, of both psyllid and bacteria, of the  
519 variation of infection in distinct organs in CLas (+) insects is an important new research frontier  
520 in this pathosystem. Improvements in RNAseq technology and CLas metagenomics will  
521 facilitate these types of studies.

522           It is more difficult to interpret whether organs are infected based on read count alone  
523 when read counts are barely above background, such as in the midguts. Kruse et al [15] reported  
524 that 82% (n=20, Cq<40) of the CLas (+) *D. citri* population which was harvested for their  
525 midguts were positive for CLas with an average qPCR Cq value of 31 across their four CLas (+)  
526 biological replicates. While 212 is not an especially large number of CLas reads post poly-A  
527 enrichment, when paired with the qPCR results, midguts, which have been shown to contain a  
528 visible slurry of CLas cells in previous work using microscopy [15, 17], may be referred to as  
529 “infected” by CLas, but at a lower level than the salivary glands. However, similar number of  
530 CLas reads were detected in the head samples from insects sampled from healthy (unexposed)  
531 trees as in the midguts. Finding a low level of reads aligning to CLas in healthy samples is not  
532 unexpected, and may be due to a few understandable reasons, such as a lack of enrichment of  
533 bacterial transcripts following poly-A enrichment for eukaryotic mRNAs, alignment errors,  
534 genome annotation errors, or homology of these reads to other psyllid-associated bacteria (the  
535 bacterial endosymbionts). CLas (-) psyllid colonies and citrus plants are reared in separate but  
536 identical environments to CLas (+) trees and insects. All materials are tested regularly and  
537 thoroughly for CLas using qPCR to rule out the possibility of CLas infection in these samples  
538 prior to experimentation.

539           Since significantly more reads aligned to CLas from the salivary gland dataset, these  
540 reads were mapped to known genes in the CLas-psy62 genome for annotation. All CLas  
541 transcripts had low read counts, most were unannotated, but two transcripts from the fig operon  
542 and one from the par operon were detected. The fig operon is part of the flagellum, and is  
543 involved in cell motility, cellular processes, chemotaxis, and overall mobility, [51] making it a  
544 potentially important gene when CLas interacts with its sub-cellular environment in the psyllid.



545 Interestingly, a BLASTx analysis of the coding sequences of both the *figB* and *figC* transcripts  
546 produced homology to multiple *Liberibacter* species (*figC* %identity range of 72.93-84.33%,  
547 *figB* %identity range of 63.08-76.15%). The non-pathogenic *Liberibacter crescens* had the  
548 lowest identity (*figC* % identity = 67.67%, *figB* % identity = 56.92%) relative to the other  
549 *Liberibacters*, including “*Ca. L. solanacearum*”, “*Ca. L. americanus*”, “*Ca. L. africanus*”, “*Ca. L.*  
550 *europaeus*” and “*Ca. L. ctenarytainae*”. These results support the hypothesis that the *fig* operon  
551 may be active in *Liberibacter* bacteria that are transmitted by psyllids.

552 The *parB* gene binds DNA and is part of the *parABS* system, which is known to play a  
553 role in bacterial chromosomal partitioning, cell cycle control and cell division, [52] and works by  
554 nicking supercoiled plasmid DNA at AT-rich regions and thus can act as a transcriptional  
555 regulator. While overall takeaways are limited due to the low number of reads aligned to this  
556 *CLas* gene, finding the *par* operon at relatively high expression when *CLas* is in the salivary  
557 glands of *D. citri* is consistent with the hypothesis of bacterial multiplication in this organ. [11]  
558 Due to the low number of *CLas* reads found in the other datasets, *parB* was not detected and thus  
559 relative expression could not be compared across tissues.

560 PCA analysis enabled a global visualization of the variation both within and across the  
561 datasets. The bi-axis separation between the four datasets as seen in Figure 2 can be partially  
562 explained by the average amount of *CLas* present (PC1) and by their sequencing (PC2). The  
563 head and bacteriome datasets were collected and multiplexed together but sequenced separately  
564 from the midgut and salivary gland datasets (which were also sequenced at different times).  
565 Head and salivary gland samples produced the highest number of reads aligning to *CLas* in the  
566 infected biological replicates, and bacteriome and midgut read counts were relatively low.  
567 Hosseinzadeh et al [21] quantified *CLas* titer in multiple organs of *D. citri* and found that

568 bacteriomes contained a very low titer of CLAs, with only the reproductive organs showing a  
569 lower titer. The bacteriome is highly specialized and designed to provide a place for replication  
570 of obligate bacteria. It is encased in a layer of psyllid cells (bacteriocytes), which could act as a  
571 barrier to CLAs entry. Despite the lack of CLAs in the bacteriome, it still had marked differences  
572 in the transcriptome between CLAs(+) and CLAs(-). For example, the Dcitr05g01800.11  
573 transcript, has a log2FoldChange of 2.473, with a length 612 nucleotides, annotated as the  
574 “PiggyBac transposable element-derived protein 4”. It was significantly differentially expressed  
575 in the bacteriome dataset and not the other datasets. In the Diaci\_v3.0 genome, this transcript is  
576 one of at least 11 PiggyBac-related genes found scattered across the genome (see Table S9). The  
577 PiggyBac (pB) transposon was first discovered 30 years ago in the cabbage looper, and now it is  
578 regularly used to transform insects, such as *Drosophila melanogaster*. PiggyBac is unique among  
579 transposases because of its specificity and seamless excision [53]. DNA between two sites with  
580 the specific sequence “TTAA” can be cleanly excised and the resulting DNA ends can perfectly  
581 match again without leaving a genomic footprint or synthesizing any new DNA. Similarly, the  
582 excised transposon can be re-integrated at any TTAA site in the genome. Due to the precision of  
583 pB, it is difficult to know exactly where Dcitr05g01800.11 originated – whether from the  
584 syncytial cytoplasmic cells, or the outer bacteriocytes. Considering what is known about pB and  
585 the bacteriome interactions with endosymbiotic bacteria, Dcitr05g01800.11 is a strong candidate  
586 for future studies of the bacteriome and using pB may open pathways for transgenesis in *D. citri*.

587         In addition to the bacteriome dataset, the infected midguts also recorded low CLAs reads,  
588 (relative to salivary glands), which may be explained by general transcriptional inactivity of  
589 CLAs during acquisition from the phloem. The relatively low replication rate in the midgut vs  
590 salivary glands may be an adaptive strategy to switch hosts from plant to insect to evade

591 detection by the psyllid immune system [11, 54]. It is interesting that, although there were low  
592 levels of CLas reads in the midgut, the impact of CLas infection on the *D. citri* transcriptome  
593 was greatest in the midgut as compared to other tissues, which showed clear separation between  
594 CLas(+) and CLas(-) samples as a result of CLas infection. In adult insects, feeding on CLas-  
595 infected plants has been shown to induce drastic morphological changes to the psyllid nuclear  
596 architecture and apoptosis in the midgut epithelial cells [16, 17]. These data suggest that the  
597 infected plant sap, and not CLas directly, may be playing a role in modulating the midgut  
598 transcriptome response.

599         Given that the head samples were collected from a different cohort of insects than the  
600 salivary gland samples, and the salivary gland transcriptome is expected to be represented to  
601 some extent in the head transcriptome, the clustering of the head and salivary gland samples in  
602 PC1 was particularly encouraging and shows that transcriptome datasets collected in different  
603 experiments can be compared in the same analysis. The excised heads contained multiple organs  
604 which CLas-infected phloem or saliva pass through including the esophagus, foregut, mouthparts  
605 and salivary glands. CLas has been found in the brain [21], which is also present in head  
606 samples. Thus, the head may contain on average, a greater number of CLas bacteria than the  
607 other datasets as it contains more organs that CLas have been shown to inhabit. However, the  
608 head of the psyllid is a highly sclerotized part of the body. Sclerotization may have led to  
609 reduced yield when extracting nucleic acids due to reduced disruption efficiency and blockage of  
610 filters, two possibilities that may have led to the low yield – both of raw reads and alignment to  
611 the *D. citri* genome in these samples. Additionally, it has been shown that eye fluids of insects  
612 can contain PCR inhibitors that may interfere with library amplification and sequencing [55, 56].

613           The *D. citri* midgut has been a focal point of many studies. The initial draft genome  
614 fueled early studies to understand CLas-*D. citri* interactions and key insights into the vector-  
615 pathogen relationship have been derived from these studies. Researchers during the 2015-2020  
616 time period used either Diaci\_v1.0 or v2.0 for their analysis. We reanalyzed the raw, adult *D.*  
617 *citri* midgut data from both healthy (CLas-) and exposed (CLas+) samples originally published  
618 in 2016 by Kruse et al [15], using the v3.0 genome, just recently released [34]. As reported by  
619 Hosmani et al, [34], the version 1.1 genome contains 19.3Mb of gaps (Ns) and a large number  
620 (161,988) of short (<1Mb) scaffolds, making this assembly a useable but highly fragmented and  
621 incomplete picture of the genome. On the other hand, the version 3.0 genome is shorter,  
622 (473.9Mb) with less gaps (13.4Mb total Ns), and contains 13 chromosomal-length scaffolds  
623 (50.3Mb) and 1244 unplaced smaller scaffolds. The version 3.0 genome is also paired with, and  
624 improved by, curated and predicted gene and transcript annotations (totaling 19,049 genes and  
625 21,345 transcripts) [33]. The improvements in overall read alignment rate of the midgut data to  
626 the v3.0 genome compared to the v1.1 genome suggests that, during alignment to the v1.1  
627 genome, thousands of *D. citri* reads were completely left out of the analysis. The lower number  
628 of transcripts that matched to genome v3.0 is consistent with the increased scaffold length and  
629 gene model improvements.

630           The full-length transcript from the v3.0 analysis was searched against the v1.1 *D. citri*  
631 genome using BLAST (see methods). These analyses clearly show how quantification accuracy  
632 is improved with the full-length gene models, as all reads matching to a particular transcript are  
633 fully accounted for and used for differential expression analysis. Though each of these transcripts  
634 being analyzed is relatively short – comprising about 600-4000 nucleotides in length - the  
635 difference in read alignment frequency can be in the hundreds. We hypothesized that an

636 improved genome sequence would change how transcriptomics results are interpreted. Analysis  
637 of a selected 4 transcripts showed this to be the case. In the v1.1 analysis, all 10 of these  
638 fragmented gene IDs and their associated transcripts would have been disregarded from the DE  
639 analysis because their adjusted p-values did not meet the significance threshold and the  
640 differential expression was nearly nonexistent ( $L2FC < |1|$ ), and/or counts were too low and  
641 lacking in the biological replicates to be used. However, according to the v3.0 analysis, each of  
642 the four genes and their transcripts should be considered in downstream pathway analyses of  
643 effects of CLas exposure as they satisfied the adjusted p-value and log2FoldChange cutoffs.  
644 Thus, by quantifying how improved genome assemblies can lead to changes in differential  
645 expression, we present evidence to show that long read sequencing or other genome sequence  
646 improvement efforts are foundational for transcriptome-wide expression studies.

647 Improved genome quality did not; however, determine what proportion of differentially  
648 expressed transcripts were up or down regulated. The proportion of differentially expressed  
649 transcripts may be derived from the biology of the organisms or samples and in part the  
650 bioinformatic pipelines. Three studies look at the midgut of *D. citri* using transcriptomics: The  
651 analysis by Kruse et al. using v1.1 [15], this study using the Kruse et al data and the v3.0  
652 genome, and a study by Yu et al. [41] using the v2.0 genome. The source of the midgut RNA is  
653 significantly different between the Yu et al. study and the Kruse et al study. Yu et al pooled  
654 midguts from *D. citri* adults raised on *Murraya exotica*, whereas Kruse et al. and thus, the  
655 current study, utilized insects raised on *Citrus medica*. Yu et al. also reported different CLas-  
656 infection rates among their individual insects pooled compared to Kruse et al. The relative  
657 proportions of transcripts that are up or down regulated in each of the three studies is not  
658 consistent, nor does the pattern become consistent with improved genome quality. In studies by

659 Yu et al. and Kruse et al., there are more up regulated transcripts (499 and 965 respectively) than  
660 down regulated transcripts (279 and 850 respectively), while in this current study, the opposite is  
661 true (176 up and 303 down) (Table S3). The midgut analysis by Kruse et al. aligned RNA reads  
662 to the *D. citri* genome assembly v1.1 using the bioinformatic tools RSEM and bowtie2 for  
663 alignment, followed by edgeR and DESeq2 for differential expression calculations. The raw data  
664 from Kruse et al. was reanalyzed in the current study using the most recent versions of the  
665 bioinformatic tools Hisat2 (genome alignment), Stringtie (transcript assembly), Ballgown and  
666 DESeq2 (differential expression). These two bioinformatic pipelines differ in their alignment  
667 algorithms, statistical methods, and importantly their ability to identify false positive and  
668 negative differentially expressed transcripts.

## 669 **Potential Implications**

670 CLas is uncultivable and methods to study CLas-*D. citri* interactions are challenging.  
671 Genome sequencing is a foundational tool for our exploration of the molecular interactions  
672 among *D. citri*, CLas, the bacterial endosymbionts and the citrus host. Our research showed that  
673 improved genome assemblies influences interpretation of transcriptomic data and that  
674 investigators have reason to re-analyze their previous *D. citri* transcriptomic data with the new  
675 genome release. The more accurate quantification provided by the Diaci\_v3 genome may reduce  
676 the need to validate transcriptomic changes using reverse transcription (RT)-PCR. We urge  
677 arthropod genome communities and funding bodies to continue to invest funds on genome  
678 improvement projects such as i5k [57] and Ag100Pest [58]. These investments can help save  
679 expenditures elsewhere by reanalyzing previously generated and yielding higher confidence in  
680 the results after using a quality genome backbone. Additionally, single-cell RNAseq is the next  
681 frontier of understanding insect-pathogen interactions, especially for intracellular symbionts, at

682 the highest resolution. Currently, single-cell RNAseq has been done on very few insects, but the  
683 list is expanding [59-62].

684 Still, a major roadblock is the functional annotation of the gene models. While automated  
685 pipelines for annotation exist at NCBI and elsewhere [63], these efforts are supplemented by  
686 manual annotation efforts [64-68] for *D. citri* and other arthropods [57]. Future work on  
687 understanding how the improved genome leads to improved quantification at the proteome level  
688 is also needed, and we hope such studies are inspired by the findings we present here.

## 689 **Methods**

### 690 **CLas titer determination by qPCR.**

691 *D. citri* CLas-exposed and unexposed colonies were tested for the presence of CLas using  
692 qPCR by amplification of the 16S rDNA using TaqMan reagents. Individual, whole-body, adult  
693 psyllids (n=50 for the midgut colony, n=20 for the salivary gland colony, n=20 for the colony  
694 used to collect heads and bacteriomes) were collected from each colony. Total DNA was  
695 extracted from individual insects using the Qiagen DNeasy kit. DNA concentration was  
696 measured using a Nanodrop spectrophotometer. Each sample was standardized to 30 ng/ul so the  
697 Cq values from each dataset can be compared directly subjected. The CLas probe (5'-FAM-  
698 AGACGGGTG/ZEN/AGTAACGCG-3') sequence and specific forward (5'-  
699 TCGAGCGCGTATGCAATACG-3') and reverse (5'-GCGTTATCCCGTAGAAAAAGGTAG-  
700 3') primers used are as published previously in Kruse et al. [15]. Unexposed colonies were tested  
701 monthly and CLas (+) colonies were tested at the time the insects were collected for dissection.  
702 Each qPCR plate contained positive and negative controls as well as a CLas 16S rDNA standard  
703 curve to allow for both absolute and relative CLas titer quantification, and every sample was run  
704 in triplicate. For our purposes, only Cq values were required to determine to whether individual

705 samples were CLAs (-/+) and to record the percent infection rate (how many out of 20 were CLAs  
706 (+)) of the colony. A sample was considered CLAs (+) if the Cq value was <40 (if there is only a  
707 single molecule in the reaction, with perfect primer efficiency, 37-40 cycles will be the cycle  
708 plateau). The Cq data from all 20 individuals, from all three colonies (bacteriomes and heads  
709 were collected from the same individuals and thus the same colony) was compiled and reported  
710 in **Figure S1**. Cq values from the CLAs unexposed insects were undetected.

711       Once colonies were confirmed CLAs (+) or CLAs(-) by qPCR, hundreds of one to two  
712 week-old adult *D. citri* were collected and pooled to create biological replicates. Midgut samples  
713 included 250 guts pooled per biological replicate [n=3 replicates each CLAs(+) and CLAs(-)],  
714 salivary gland replicates each included 150 pooled extirpations [n=4 replicates each CLAs(+) and  
715 CLAs(-)], while 120 bacteriomes and heads were pooled for each replicate [n=5 replicates each  
716 CLAs(+) and CLAs(-)]. Salivary glands and midguts were pooled in TriZol while bacteriomes and  
717 heads were pooled in beta-mercaptoethanol and Qiagen RLT buffer. Samples were stored at -  
718 80C until RNA extraction. The paired-end 150bp Illumina sequencing, raw data was uploaded to  
719 NCBI and is accessible to reviewers via BioProject accession # PRJNA385527, submission  
720 ID SUB10382129 and will be made available to the public upon publication.

721 ***In silico* quality control and cleaning of raw data to reduce confounding factors in analysis.**

722       Data analysis was conducted on servers hosted by the Computational Biology Center at  
723 the Boyce Thompson Institute. Data for all four datasets (bacteriome, head, salivary gland and  
724 midgut) were subjected to identical computational assessments and manipulations to eliminate  
725 variability caused by analysis methods. Total raw mRNA reads were first analyzed with FastQC  
726 [69] to gauge the presence of anomalies and adapters. Illumina Universal adapters that were  
727 present were removed by first interleaving/merging together forward and reverse reads into one



728 large file. This file was then presented to AdapterRemover [70] using the Unix commands  
729 suggested in the manual for PE analysis. AdapterRemover output a file of interleaved paired-end  
730 reads that survived adapter removal. FastQC was run for the second time on this file to confirm  
731 adapter removal and check remaining read lengths and total remaining read quantity. This  
732 interleaved file was then used as input for SortMeRNA [71] which removes rRNA that survived  
733 the poly-A enrichment *in silico*, based on rRNA databases for bacteria, eukaryotes and archaea  
734 provided with the software program. Seed length was adjusted from default 18 down to 14  
735 during rRNA database file indexing to be compatible with the minimum length reads in the  
736 current data set. SortMeRNA supplied two output types: 1) Those reads that mapped to rRNA  
737 (both forward and reverse reads had to map to be included), and 2) those where one or both of  
738 the paired end reads did not map to rRNA, such that the non-rRNA read pool contained some  
739 single strand sequences that aligned to rRNA. Separating out rRNA reduced over expression and  
740 bias of ribosomal gene expression in the datasets without totally removing rRNAs from the  
741 analysis. Low quality sequences (QC<20) were removed with Trimmomatic [72]. Paired reads  
742 where one or more are shorter than 17 nucleotides were then discarded. FastQC was run for the  
743 third time on these files to check their new read length distribution, read number and overall  
744 quality. A shell script was used to unmerge the forward and reverse reads for each sample file  
745 (reverse interleaving), creating a set of paired-end data files containing “cleaned reads” that  
746 could be used in the following steps.

747 **Read alignment to multiple genomes and differential transcript expression for each dataset.**

748 All four datasets comprised of cleaned, paired-end mRNA reads were aligned to both the  
749 v3.0 *D. citri* genome and the “*Candidatus Liberibacter asiaticus*” psy62 genome available on  
750 NCBI. The midgut dataset was additionally aligned to the v1.1 *D. citri* genome. The

751 computational methods closely follow those published by Pertea et al., [73] and include the  
752 following: Each *D. citri* genome was indexed using HISAT2 (*hisat2-build*) [74]. Total cleaned  
753 reads were aligned to the indexed genome using *hisat2* and standard settings for PE data as  
754 described in the HISAT2 manual [74]. Specifically, options added to the base function included  
755 index memory mapping (*--mm*); setting the number of server threads to increase the speed of the  
756 alignment (*-p*); specifying output file names for both concordant alignments and non-concordant  
757 alignments (*--al-conc* and *--un-conc*, respectively); specifying which of the input files was  
758 forward or reverse (specified by “RF” showing -1 was reverse and -2 was forward); and tailored  
759 the output file organization for the possibility of downstream transcript assembly (*--dta*).  
760 Additionally, read alignment statistics were directed into a .stdout file for ease of future  
761 reference. Reads that aligned concordantly (collected in the *--al-conc* output file) were checked  
762 with FastQC and used in the next steps. Following alignment, the SAM files were converted to  
763 BAM to save space and then sorted by name using SAMtools [75]. Once sorted, reads were  
764 bundled into transcripts using Stringtie [76] based on their alignments and promptly re-aligned to  
765 the .GTF/.GFF file specific to each genome, containing information on all known genes for that  
766 genome. This process labeled each transcript with a specific Gene\_ID, genomic location and  
767 information on introns/exons. Finally, using the number of transcripts that align to each gene, a  
768 count matrix was formed using Stringtie and ballgown [73] to allow downstream differential  
769 expression (DE) analysis between CLas (-) and CLas (+) replicates, paired with data  
770 visualization. Differential expression was performed in R (v3.3.3) using DESeq2 [77], following  
771 standard protocols (DE determined by setting CLas (-) as the denominator such that positive  
772 Log2FoldChange (L2FC) indicates greater expression in CLas (+) replicates and negative L2FC  
773 indicates reduced expression in CLas (+) replicates relative to CLas (-)). Because each dataset

774 (except bacteriome and head) was collected and sequenced separately, normalizing the datasets  
775 to each other had too many experimental variables that were uncontrollable, so DE analysis for  
776 CLas (-/+) was performed separately for each dataset. DE results, like those of the qPCR Cq  
777 data, could be compared directly for transcripts within a dataset, while transcripts across datasets  
778 could be qualified, though no direct or quantitative comparison of expression could be made  
779 between datasets. Reads that aligned to CLas in the CLas (+) samples were counted and only  
780 certain transcripts of interest were analyzed further.

### 781 **Statistics and data visualization of results.**

782 A variety of statistical methods and data visualization tools were utilized. A principal  
783 components analysis (PCA) of all four datasets combined was performed in R (*prcomp* and *plot*)  
784 using a large transcript count matrix combining the transcript expression count matrices from the  
785 four datasets. The count data was minimally normalized by transcript counts per million and  
786 transcripts not present in both CLas (-) and CLas (+) replicates were removed. Individual PCA  
787 plots were also generated in R (*plotPCA* and *ggplot*) to show separation between CLas (-) and  
788 CLas (+) biological replicates, using the DESeq2 rlog-transformed transcript data for each  
789 dataset individually. Following PCA analysis, R was used to generate Volcano plots of the  
790 differentially expressed transcripts from each dataset individually, again using the DESeq2 rlog-  
791 transformed data. The L2FC of each DE transcript was plotted against the negative log of the  
792 adjusted p-value ( $-\log(\text{padj})$ ) for the same transcript using *ggplot*.

793 The comparison of expression results from the midgut dataset when aligned to either v3.0  
794 or v1.1 of the *D. citri* genome was started by choosing four transcripts present and expressed in  
795 both analyses. The two genomes presented different gene\_IDs and genomic location coordinates  
796 which was problematic for direct comparison of changes in expression or even direct comparison

797 of transcripts. The transcript sequence from Diaci\_v3.0 was analyzed using BLASTx against the  
798 v1.1 genome to determine which v1.1 transcripts aligned to the v3.0 transcript and whether  
799 alignment was partial or full. To demonstrate differences in read distribution between the two  
800 genomes for each of the four transcripts and to show differential alignment frequencies, the v3.0  
801 transcript sequences and associated v1.1 transcript sequences were used as a genome backbone  
802 and total cleaned reads were re-aligned to these sequences using HISAT2 to generate the .BAM  
803 files of read alignments for each transcript. Coverage maps were generated for each transcript  
804 using an R script (*BEDtools*) written by Dave Tang [78]. The general pattern of coverage from  
805 these coverage plots was duplicated in cartoon form on top of the respective transcript cartoon, to  
806 demonstrate the differences in read alignment location and frequency between the two *D. citri*  
807 genomes.

808       Potential secreted effectors were determined from the list of top DE transcripts of the  
809 salivary gland dataset by running two programs – SignalP-v5.0 [79] which accesses protein  
810 sequences for the presence of signal peptides, and Phobius [80] which detects both signal  
811 peptides and transmembrane helices (TMHs) from a protein sequence. Transcripts that putatively  
812 contained signal peptides but not TMHs were considered candidate salivary gland effector  
813 proteins.

814

## 815 **Additional Information Sections**

816 Data Submission Information for Reviewers:

817       Title specific to data itself: The RNAseq data for the transcriptome analysis of multiple

818       *D. citri* organs including the head, bacteriome and salivary gland.

819 Abstract: Paired-end 150bp mRNA-seq raw read files generated from pools of organs,  
820 which may include contaminants and/or other endosymbionts in addition to *Candidatus*  
821 *Liberibacter asiaticus*. Data is ideal for differential gene expression analysis.

822 Author list: Marina Mann, Surya Saha, Lukas A. Mueller, Michelle Heck

823 Data types: poly-A enriched RNA, i.e transcriptome data

824 Organisms/Tissues of each data type: All data from *Diaphorina citri*, tissues include gut,  
825 bacteriome, salivary gland, and head plus thoracic segment 1 and antennae.

826 Estimate of dataset size: 120 G

827 File organization: Tar archive named “Dcitri\_SG\_BAC\_HEAD\_mRNA.tar” which  
828 contains three sub-archives in the following order, called “BACarchive.tar”,  
829 “HEADarchive.tar”, “SGarchive.tar”. Each sub archive contains gzipped fastq files for  
830 forward and reverse of every biological replicate.

831 Acknowledgments: Funding to generate samples and sequence them from Michelle Heck  
832 and Lukas Mueller, USDA-NIFA grants 2015-70016-23028 and 2020-70029-33199.

833 Declarations

834

835 List of abbreviations

836 All abbreviations have been defined in the manuscript.

837 Consent for publication

838 Not Applicable.

839 Competing interests

840 The author(s) declare that they have no competing interests

841

842 Funding

843 This project was funded by NIFA Predoctoral Fellowship 2021-67011-35143 (MM) USDA-

844 NIFA grants 2015-70016-23028 (MH and LM), 2020-70029-33199 (LM) and USDA ARS

845 Project number 8062-22410-007-00-D (MH).

846

847 Authors' contributions

848 MM: Took part in, or led, all aspects including conceptualization, data curation, formal analysis,

849 funding acquisition, investigation, methodology, validation, visualization and writing of original

850 draft as well as review and editing.

851 SS: Funding acquisition, conceptualization, methodology, resources, writing - review and

852 editing.

853 JMC: Visualization, writing – review and editing, data curation.

854 MP: Methodology, resources, software, writing – review and editing.

855 KM: Data curation, resources.

856 LC: Funding acquisition, project administration, resources, supervision.

857 WBH: Funding acquisition, project administration, resources, supervision, writing – review and

858 editing.

859 LAM: Funding acquisition, project administration, methodology, conceptualization resources,

860 supervision, writing – review and editing.

861 MH: Conceptualization, investigation, methodology, project administration, resources,

862 supervision, validation, visualization, writing of original draft and reviews and edits.

863

864 Acknowledgements

865 We thank Jaclyn Mahoney (Cornell University) for assistance with lab work, Dr. Angela Kruse

866 (now at Vanderbilt University) for teaching Marina Mann how to extract RNA from psyllid

867 organs while Dr. Kruse was a graduate student at Cornell, Tracy Bell and Hanna Mann from

868 IRREC at Fort Pierce, FL for their assistance with excision of salivary glands. We are also

869 grateful to Dr. Robert Krueger at the USDA ARS Citrus Germplasm Repository for providing

870 the Heck lab with pathogen-free citrus seeds.

871

## 872 References

- 873 1. Wang N, Stelinski LL, Pelz-Stelinski KS, Graham JH and Zhang Y. Tale of the  
874 Huanglongbing Disease Pyramid in the Context of the Citrus Microbiome. *Phytopathol.*  
875 2017;107 4:380-7. doi:10.1094/PHYTO-12-16-0426-RVW.
- 876 2. Wang N, Pierson EA, Setubal JC, Xu J, Levy JG, Zhang Y, et al. The Candidatus  
877 Liberibacter-Host Interface: Insights into Pathogenesis Mechanisms and Disease Control.  
878 *Annu Rev Phytopathol.* 2017;55:451-82. doi:10.1146/annurev-phyto-080516-035513.
- 879 3. Ammar E-D, Jr RGS and Heck M. 8 Huanglongbing Pathogens: Acquisition,  
880 Transmission and Vector Interactions. *Asian Citrus Psyllid: Biology, Ecology and*  
881 *Management of the Huanglongbing Vector.* 2020:113.
- 882 4. McRoberts N, Dunn R and Deniston-Sheets H. Mining value from ACP prevalence data.  
883 *Citrograph.* 2021;12 1:38-41.
- 884 5. Ramsey JS, Chin EL, Chavez JD, Saha S, Mischuk D, Mahoney J, et al. Longitudinal  
885 Transcriptomic, Proteomic, and Metabolomic Analysis of *Citrus limon* Response to Graft  
886 Inoculation by *Candidatus Liberibacter asiaticus*. *J Proteome Res.* 2020;19 6:2247-63.  
887 doi:10.1021/acs.jproteome.9b00802.
- 888 6. Chin EL, Ramsey JS, Mischuk DO, Saha S, Foster E, Chavez JD, et al. Longitudinal  
889 Transcriptomic, Proteomic, and Metabolomic Analyses of *Citrus sinensis* (L.) Osbeck  
890 Graft-Inoculated with "*Candidatus Liberibacter asiaticus*". *J Proteome Res.* 2020;19  
891 2:719-32. doi:10.1021/acs.jproteome.9b00616.
- 892 7. Lee JA, Halbert SE, Dawson WO, Robertson CJ, Keesling JE and Singer BH.  
893 Asymptomatic spread of huanglongbing and implications for disease control. *Proc Natl*  
894 *Acad Sci U S A.* 2015;112 24:7605-10. doi:10.1073/pnas.1508253112.
- 895 8. Meng L, Li X, Cheng X and Zhang H. 16S rRNA Gene Sequencing Reveals a Shift in the  
896 Microbiota of *Diaphorina citri* During the Psyllid Life Cycle. *Front Microbiol.*  
897 2019;10:1948. doi:10.3389/fmicb.2019.01948.
- 898 9. Ammar E-D, Ramos JE, Hall DG, Dawson WO and Shatters RG, Jr. Acquisition,  
899 Replication and Inoculation of *Candidatus Liberibacter asiaticus* following Various



- 900 Acquisition Periods on Huanglongbing-Infected Citrus by Nymphs and Adults of the  
901 Asian Citrus Psyllid. PLoS One. 2016;11 7:e0159594.  
902 doi:10.1371/journal.pone.0159594.
- 903 10. Ammar ED, Hall DG, Hosseinzadeh S and Heck M. The quest for a non-vector psyllid:  
904 Natural variation in acquisition and transmission of the huanglongbing pathogen  
905 '*Candidatus Liberibacter asiaticus*' by Asian citrus psyllid isofemale lines. PLoS One.  
906 2018;13 4:e0195804. doi:10.1371/journal.pone.0195804.
- 907 11. Ammar ED, Shatters RG and Hall DG. Localization of *Candidatus Liberibacter asiaticus*,  
908 Associated with Citrus Huanglongbing Disease, in its Psyllid Vector using Fluorescence  
909 in situ Hybridization. J Phytopathol. 2011;159 11-12:726-34. doi:DOI 10.1111/j.1439-  
910 0434.2011.01836.x.
- 911 12. Ammar E, Shatters RG, Lynch C and Hall DG. Detection and Relative Titer of  
912 *Candidatus Liberibacter asiaticus* in the Salivary Glands and Alimentary Canal of  
913 *Diaphorina citri* (Hemiptera: Psyllidae) Vector of Citrus Huanglongbing Disease. Ann  
914 Entomol Soc Am. 2011;104 3:526-33. doi:10.1603/AN10134.
- 915 13. Brown JK, Cicero, J.M. and Fisher, T.W. Psyllid-transmitted *Candidatus Liberibacter*  
916 species infecting citrus and solanaceous hosts. St. Paul, Minnesota: American  
917 Phytopathological Society; 2016.
- 918 14. JM C. Functional anatomy of the Asian citrus psyllid. In: Qureshi JaSP, editor. Asian  
919 citrus psyllid: Biology, ecology and management of the huanglongbing vector. CAB  
920 International; 2020.
- 921 15. Kruse A, Fattah-Hosseini S, Saha S, Johnson R, Warwick E, Sturgeon K, et al.  
922 Combining 'omics and microscopy to visualize interactions between the Asian citrus  
923 psyllid vector and the Huanglongbing pathogen *Candidatus Liberibacter asiaticus* in the  
924 insect gut. PLoS One. 2017;12 6:e0179531. doi:10.1371/journal.pone.0179531.
- 925 16. Ghanim M, Fattah-Hosseini S, Levy A and Cilia M. Morphological abnormalities and  
926 cell death in the Asian citrus psyllid (*Diaphorina citri*) midgut associated with  
927 *Candidatus Liberibacter asiaticus*. Sci Rep. 2016;6:33418. doi:10.1038/srep33418.
- 928 17. Mann M, Fattah-Hosseini S, Ammar ED, Stange R, Warrick E, Sturgeon K, et al.  
929 *Diaphorina citri* Nymphs Are Resistant to Morphological Changes Induced by  
930 "*Candidatus Liberibacter asiaticus*" in Midgut Epithelial Cells. Infect Immun. 2018;86 4  
931 doi:10.1128/IAI.00889-17.
- 932 18. Ghanim M, Achor D, Ghosh S, Kontsedalov S, Lebedev G and Levy A. '*Candidatus*  
933 *Liberibacter asiaticus*' Accumulates inside Endoplasmic Reticulum Associated Vacuoles  
934 in the Gut Cells of *Diaphorina citri*. Sci Rep. 2017;7 1:16945. doi:10.1038/s41598-017-  
935 16095-w.
- 936 19. Coy M and Stelinski LL. Great Variability in the Infection Rate of '*Candidatus*  
937 *Liberibacter Asiaticus*' in Field Populations of *Diaphorina citri* (Hemiptera: Liviidae) in  
938 Florida. Florida Entomologist. 2015;98 1:356-7.
- 939 20. Hall D. Incidence of "*Candidatus Liberibacter asiaticus*" in a Florida population of Asian  
940 citrus psyllid. Journal of Applied Entomology. 2018;142 1-2:97-103.
- 941 21. Hosseinzadeh S, Shams-Bakhsh M, Mann M, Fattah-Hosseini S, Bagheri A, Mehrabadi  
942 M, et al. Distribution and Variation of Bacterial Endosymbiont and "*Candidatus*  
943 *Liberibacter asiaticus*" Titer in the Huanglongbing Insect Vector, *Diaphorina citri*  
944 Kuwayama. Microb Ecol. 2019;78 1:206-22. doi:10.1007/s00248-018-1290-1.



- 945 22. Dossi FC, da Silva EP and Consoli FL. Population dynamics and growth rates of  
946 endosymbionts during *Diaphorina citri* (Hemiptera, Liviidae) ontogeny. *Microb Ecol.*  
947 2014;68 4:881-9. doi:10.1007/s00248-014-0463-9.
- 948 23. Saha S, Hunter WB, Reese J, Morgan JK, Marutani-Hert M, Huang H, et al. Survey of  
949 endosymbionts in the *Diaphorina citri* metagenome and assembly of a Wolbachia wDi  
950 draft genome. *PLoS One.* 2012;7 11:e50067. doi:10.1371/journal.pone.0050067.
- 951 24. Chu CC, Gill TA, Hoffmann M and Pelz-Stelinski KS. Inter-Population Variability of  
952 Endosymbiont Densities in the Asian Citrus Psyllid (*Diaphorina citri* Kuwayama).  
953 *Microb Ecol.* 2016;71 4:999-1007. doi:10.1007/s00248-016-0733-9.
- 954 25. Nakabachi A, Ueoka R, Oshima K, Teta R, Mangoni A, Gurgui M, et al. Defensive  
955 bacteriome symbiont with a drastically reduced genome. *Curr Biol.* 2013;23 15:1478-84.  
956 doi:10.1016/j.cub.2013.06.027.
- 957 26. Guidolin AS and Consoli FL. Molecular characterization of Wolbachia strains associated  
958 with the invasive Asian citrus psyllid *Diaphorina citri* in Brazil. *Microb Ecol.* 2013;65  
959 2:475-86. doi:10.1007/s00248-012-0150-7.
- 960 27. Morrow JL, Om N, Beattie GAC, Chambers GA, Donovan NJ, Liefting LW, et al.  
961 Characterization of the bacterial communities of psyllids associated with Rutaceae in  
962 Bhutan by high throughput sequencing. *BMC Microbiol.* 2020;20 1:215.  
963 doi:10.1186/s12866-020-01895-4.
- 964 28. Ramsey J, Chavez J, Johnson R, Hosseinzadeh S, Mahoney J, Mohr J, et al. Protein  
965 interaction networks at the host-microbe interface in *Diaphorina citri*, the insect vector  
966 of the citrus greening pathogen. *Royal Society Open Science.* 2017;4 2:160545.
- 967 29. Ramsey JS, Johnson RS, Hoki JS, Kruse A, Mahoney J, Hilf ME, et al. Metabolic  
968 Interplay between the Asian Citrus Psyllid and Its Proffttella Symbiont: An Achilles' Heel  
969 of the Citrus Greening Insect Vector. *PLoS One.* 2015;10 11:e0140826.  
970 doi:10.1371/journal.pone.0140826.
- 971 30. Coates LC, Mahoney J, Ramsey JS, Warwick E, Johnson R, MacCoss MJ, et al.  
972 Development on *Citrus medica* infected with '*Candidatus Liberibacter asiaticus*' has sex-  
973 specific and -nonspecific impacts on adult *Diaphorina citri* and its endosymbionts. *PLoS*  
974 *One.* 2020;15 10:e0239771. doi:10.1371/journal.pone.0239771.
- 975 31. Flores-Gonzalez M, Hosmani PS, Fernandez-Pozo N, Mann M, Humann JL, Main D, et  
976 al. Citrusgreening.org: An open access and integrated systems biology portal for the  
977 Huanglongbing (HLB) disease complex. *bioRxiv.* 2019:868364. doi:10.1101/868364.
- 978 32. Reese J, Christenson MK, Leng N, Saha S, Cantarel B, Lindeberg M, et al.  
979 Characterization of the Asian Citrus Psyllid Transcriptome. *J Genomics.* 2014;2:54-8.  
980 doi:10.7150/jgen.7692.
- 981 33. Saha S, Hosmani PS, Villalobos-Ayala K, Miller S, Shippy T, Flores M, et al. Improved  
982 annotation of the insect vector of citrus greening disease: biocuration by a diverse  
983 genomics community. *Database (Oxford).* 2017;2017:bax032-bax.  
984 doi:10.1093/database/bax032.
- 985 34. Prashant S, Hosmani MF-G, Teresa Shippy, Chad Vosburg, Crissy Massimino, Will  
986 Tank, Max Reynolds, Blessy Tamayo, Sherry Miller, Jordan Norus, Kyle Kercher, Bec  
987 Grace, Margaryta Jernigan, Doug Harper, Sam Adkins, Yesmarie DeLaFlor, Thomson  
988 Paris, Sara Vandervoort, Rebekah Adams, Seantel Norman, Jessica Ventura, Michael  
989 Perry, Matthew Weirauch, Josh Benoit, Wayne B. Hunter, Helen Wiersma-Koch, Tom  
990 D'elia, Susan Brown, Lukas A. Mueller and Surya Saha. Chromosomal length reference

- 991 assembly for *Diaphorina citri* using single-molecule sequencing and Hi-C proximity  
992 ligation with manually curated genes in developmental, structural and immune  
993 pathways. *bioRxiv*. 2020; doi:<https://doi.org/10.1101/869685>
- 994 35. Leng N, English A, Johnson S, Richards S, Hunter W and Saha S. *Diaphorina citri*  
995 genome assembly Diaci 1.1. 2017.
- 996 36. Fleites LA, Johnson R, Kruse AR, Nachman RJ, Hall DG, MacCoss M, et al.  
997 Peptidomics Approaches for the Identification of Bioactive Molecules from *Diaphorina*  
998 *citri*. *J Proteome Res*. 2020;19 4:1392-408. doi:10.1021/acs.jproteome.9b00509.
- 999 37. Hosseinzadeh S, Ramsey J, Mann M, Bennett L, Hunter WB, Shams-Bakhsh M, et al.  
1000 Color morphology of *Diaphorina citri* influences interactions with its bacterial  
1001 endosymbionts and '*Candidatus Liberibacter asiaticus*'. *PLoS One*. 2019;14 5:e0216599.  
1002 doi:10.1371/journal.pone.0216599.
- 1003 38. Kruse A, Ramsey JS, Johnson R, Hall DG, MacCoss MJ and Heck M. *Candidatus*  
1004 *Liberibacter asiaticus* Minimally Alters Expression of Immunity and Metabolism Proteins  
1005 in Hemolymph of *Diaphorina citri*, the Insect Vector of Huanglongbing. *J Proteome Res*.  
1006 2018;17 9:2995-3011. doi:10.1021/acs.jproteome.8b00183.
- 1007 39. Wu Z, Pu X, Shu B, Bin S and Lin J. Transcriptome analysis of putative detoxification  
1008 genes in the Asian citrus psyllid, *Diaphorina citri*. *Pest Manag Sci*. 2020;76 11:3857-70.  
1009 doi:10.1002/ps.5937.
- 1010 40. Wu ZZ, Qu MQ, Chen MS and Lin JT. Proteomic and transcriptomic analyses of saliva  
1011 and salivary glands from the Asian citrus psyllid, *Diaphorina citri*. *J Proteomics*.  
1012 2021;238:104136. doi:10.1016/j.jprot.2021.104136.
- 1013 41. Yu HZ, Li NY, Zeng XD, Song JC, Yu XD, Su HN, et al. Transcriptome Analyses of  
1014 *Diaphorina citri* Midgut Responses to *Candidatus Liberibacter Asiaticus* Infection.  
1015 *Insects*. 2020;11 3 doi:10.3390/insects11030171.
- 1016 42. Alba-Tercedor J, Hunter WB and Alba-Alejandre I. Using micro-computed tomography  
1017 to reveal the anatomy of adult *Diaphorina citri* Kuwayama (Insecta: Hemiptera, Liviidae)  
1018 and how it pierces and feeds within a citrus leaf. *Sci Rep*. 2021;11 1:1358.  
1019 doi:10.1038/s41598-020-80404-z.
- 1020 43. Cicero JM and Brown JK. A stationary tweezer platform for high throughput dissections  
1021 of minute arthropods and extirpation of their minute organs. *MethodsX*. 2021;8:101317.
- 1022 44. Rio DC, Ares M, Jr., Hannon GJ and Nilsen TW. Purification of RNA using TRIzol (TRI  
1023 reagent). *Cold Spring Harb Protoc*. 2010;2010 6:pdb prot5439.  
1024 doi:10.1101/pdb.prot5439.
- 1025 45. Zhong S, Joung JG, Zheng Y, Chen YR, Liu B, Shao Y, et al. High-throughput illumina  
1026 strand-specific RNA sequencing library preparation. *Cold Spring Harb Protoc*. 2011;2011  
1027 8:940-9. doi:10.1101/pdb.prot5652.
- 1028 46. Duan Y, Zhou L, Hall DG, Li W, Doddapaneni H, Lin H, et al. Complete genome  
1029 sequence of citrus huanglongbing bacterium, '*Candidatus Liberibacter asiaticus*' obtained  
1030 through metagenomics. *Mol Plant Microbe Interact*. 2009;22 8:1011-20.  
1031 doi:10.1094/MPMI-22-8-1011.
- 1032 47. Chung M, Teigen L, Liu H, Libro S, Shetty A, Kumar N, et al. Targeted enrichment  
1033 outperforms other enrichment techniques and enables more multi-species RNA-Seq  
1034 analyses. *Sci Rep*. 2018;8 1:13377. doi:10.1038/s41598-018-31420-7.
- 1035 48. Kukurba KR and Montgomery SB. RNA Sequencing and Analysis. *Cold Spring Harb*  
1036 *Protoc*. 2015;2015 11:951-69. doi:10.1101/pdb.top084970.

- 1037 49. Pelz-Stelinski KS and Killiny N. Better Together: Association With '*Candidatus*  
1038 *Liberibacter Asiaticus*' Increases the Reproductive Fitness of Its Insect Vector,  
1039 *Diaphorina citri* (Hemiptera: Liviidae). *Ann Entomol Soc Am.* 2016;109 3:371-6.  
1040 doi:10.1093/aesa/saw007.
- 1041 50. Cilia M, Tamborindeguy C, Fish T, Howe K, Thannhauser TW and Gray S. Genetics  
1042 coupled to quantitative intact proteomics links heritable aphid and endosymbiont protein  
1043 expression to circulative polerovirus transmission. *J Virol.* 2011;85 5:2148-66.  
1044 doi:10.1128/JVI.01504-10.
- 1045 51. Homma M, Kutsukake K, Hasebe M, Iino T and Macnab RM. FlgB, FlgC, FlgF and  
1046 FlgG. A family of structurally related proteins in the flagellar basal body of *Salmonella*  
1047 *typhimurium*. *J Mol Biol.* 1990;211 2:465-77. doi:10.1016/0022-2836(90)90365-S.
- 1048 52. Jalal ASB and Le TBK. Bacterial chromosome segregation by the ParABS system. *Open*  
1049 *Biol.* 2020;10 6:200097. doi:10.1098/rsob.200097.
- 1050 53. Q Chen WL, RA Veach, AB Hickman, M Wilson, F Dyda. Structural basis of seamless  
1051 excision and specific targeting by *piggyBac* transposase. *Nature Communications.*  
1052 2020;11 3446.
- 1053 54. Yan Q, Sreedharan A, Wei S, Wang J, Pelz-Stelinski K, Folimonova S, et al. Global gene  
1054 expression changes in *Candidatus Liberibacter asiaticus* during the transmission in  
1055 distinct hosts between plant and insect. *Mol Plant Pathol.* 2013;14 4:391-404.  
1056 doi:10.1111/mpp.12015.
- 1057 55. Boncristiani H, Li J, Evans JD, Pettis J and Chen Y. Scientific note on PCR inhibitors in  
1058 the compound eyes of honey bees, *Apis mellifera*. *Apidologie.* 2011;42 4:457-60.  
1059 doi:10.1007/s13592-011-0009-9.
- 1060 56. Schrader C, Schielke A, Ellerbroek L and Johne R. PCR inhibitors - occurrence,  
1061 properties and removal. *J Appl Microbiol.* 2012;113 5:1014-26. doi:10.1111/j.1365-  
1062 2672.2012.05384.x.
- 1063 57. Poelchau M, Childers C, Moore G, Tsavatapalli V, Evans J, Lee CY, et al. The i5k  
1064 Workspace@NAL--enabling genomic data access, visualization and curation of  
1065 arthropod genomes. *Nucleic Acids Res.* 2015;43 Database issue:D714-9.  
1066 doi:10.1093/nar/gku983.
- 1067 58. Childers AK, Geib SM, Sim SB, Poelchau MF, Coates BS, Simmonds TJ, et al. The  
1068 USDA-ARS Ag100Pest Initiative: High-Quality Genome Assemblies for Agricultural  
1069 Pest Arthropod Research. *Insects.* 2021;12 7 doi:10.3390/insects12070626.
- 1070 59. Severo MS, Landry JJM, Lindquist RL, Goosmann C, Brinkmann V, Collier P, et al.  
1071 Unbiased classification of mosquito blood cells by single-cell genomics and high-content  
1072 imaging. *Proc Natl Acad Sci U S A.* 2018;115 32:E7568-E77.  
1073 doi:10.1073/pnas.1803062115.
- 1074 60. Traniello IM, Bukhari SA, Kevill J, Ahmed AC, Hamilton AR, Naeger NL, et al. Meta-  
1075 analysis of honey bee neurogenomic response links Deformed wing virus type A to  
1076 precocious behavioral maturation. *Sci Rep.* 2020;10 1:3101. doi:10.1038/s41598-020-  
1077 59808-4.
- 1078 61. Raddi G, Barletta ABF, Efremova M, Ramirez JL, Cantera R, Teichmann SA, et al.  
1079 Mosquito cellular immunity at single-cell resolution. *Science.* 2020;369 6507:1128-32.  
1080 doi:10.1126/science.abc0322.
- 1081 62. Feng M, Xia J, Fei S, Peng R, Wang X, Zhou Y, et al. Identification of Silkworm  
1082 Hemocyte Subsets and Analysis of Their Response to Baculovirus Infection Based on

- 1083 Single-Cell RNA Sequencing. *Front Immunol.* 2021;12:645359.  
1084 doi:10.3389/fimmu.2021.645359.
- 1085 63. Surya Saha AMC, Anna K Childers, Monica F Poelchau, Fiona M McCarthy. Workflows  
1086 for rapid functional annotation of diverse arthropod genomes. *bioRxiv.*  
1087 2021.06.12.448177 doi:<https://doi.org/10.1101/2021.06.12.448177>
- 1088 64. Vosburg C, Reynolds M, Noel R, Shippy T, Hosmani PS, Flores-Gonzalez M, et al.  
1089 Utilizing a chromosomal-length genome assembly to annotate the Wnt signaling pathway  
1090 in the Asian citrus psyllid, *Diaphorina citri*. *Gigabyte.* 2021;2021:1-15.  
1091 doi:10.46471/gigabyte.21.
- 1092 65. Sharma P, Al-Dossary O, Alsubaie B, Al-Mssallem I, Nath O, Mitter N, et al.  
1093 Improvements in the sequencing and assembly of plant genomes. *Gigabyte.* 2021;2021:1-  
1094 10. doi:10.46471/gigabyte.24.
- 1095 66. Miller S, Shippy TD, Hosmani PS, Flores-Gonzalez M, Mueller LA, Hunter WB, et al.  
1096 Annotation of segmentation pathway genes in the Asian citrus psyllid, *Diaphorina citri*.  
1097 *Gigabyte.* 2021;2021:1-13. doi:10.46471/gigabyte.26.
- 1098 67. Miller S, Shippy TD, Tamayo B, Hosmani PS, Flores-Gonzalez M, Mueller LA, et al. In  
1099 silico characterization of chitin deacetylase genes in the *Diaphorina citri* genome.  
1100 *Gigabyte.* 2021;2021:1-11. doi:10.46471/gigabyte.25.
- 1101 68. Miller S, Shippy TD, Tamayo B, Hosmani PS, Flores-Gonzalez M, Mueller LA, et al.  
1102 Annotation of chitin biosynthesis genes in *Diaphorina citri*, the Asian citrus psyllid.  
1103 *Gigabyte.* 2021;2021:1-12. doi:10.46471/gigabyte.23.
- 1104 69. Bioinformatics B: FastQC v0.11.8.  
1105 <https://www.bioinformatics.babraham.ac.uk/projects/fastqc/>. Accessed Dec 29 2019.
- 1106 70. Schubert M, Lindgreen S and Orlando L. AdapterRemoval v2: rapid adapter trimming,  
1107 identification, and read merging. *BMC Res Notes.* 2016;9 1:88. doi:10.1186/s13104-016-  
1108 1900-2.
- 1109 71. Kopylova: SortMeRNA v2.1b. <http://bioinfo.lifl.fr/RNA/sortmerna> (2014).
- 1110 72. Bolger AM, Lohse M and Usadel B. Trimmomatic: a flexible trimmer for Illumina  
1111 sequence data. *Bioinformatics.* 2014;30 15:2114-20. doi:10.1093/bioinformatics/btu170.
- 1112 73. Pertea M, Kim D, Pertea GM, Leek JT and Salzberg SL. Transcript-level expression  
1113 analysis of RNA-seq experiments with HISAT, StringTie and Ballgown. *Nat Protoc.*  
1114 2016;11 9:1650-67. doi:10.1038/nprot.2016.095.
- 1115 74. Kim D, Paggi JM, Park C, Bennett C and Salzberg SL. Graph-based genome alignment  
1116 and genotyping with HISAT2 and HISAT-genotype. *Nat Biotechnol.* 2019;37 8:907-15.  
1117 doi:10.1038/s41587-019-0201-4.
- 1118 75. Li: Samtools – Utilities for the Sequence Alignment/Map (SAM) format.  
1119 <https://github.com/samtools/samtools> (2018).
- 1120 76. Kovaka S, Zimin AV, Pertea GM, Razaghi R, Salzberg SL and Pertea M. Transcriptome  
1121 assembly from long-read RNA-seq alignments with StringTie2. *Genome Biol.* 2019;20  
1122 1:278. doi:10.1186/s13059-019-1910-1.
- 1123 77. Love MI, Huber W and Anders S. Moderated estimation of fold change and dispersion  
1124 for RNA-seq data with DESeq2. *Genome Biol.* 2014;15 12:550. doi:10.1186/s13059-  
1125 014-0550-8.
- 1126 78. D T: Creating a coverage plot using BEDTools and R.  
1127 <https://davetang.org/muse/2015/08/05/creating-a-coverage-plot-using-bedtools-and-r/>  
1128 (2015). Accessed July 2 2021.

- 1129 79. Almagro Armenteros JJ, Tsirigos KD, Sonderby CK, Petersen TN, Winther O, Brunak S,  
1130 et al. SignalP 5.0 improves signal peptide predictions using deep neural networks. Nat  
1131 Biotechnol. 2019;37 4:420-3. doi:10.1038/s41587-019-0036-z.
- 1132 80. Kall L, Krogh A and Sonnhammer EL. Advantages of combined transmembrane  
1133 topology and signal peptide prediction--the Phobius web server. Nucleic Acids Res.  
1134 2007;35 Web Server issue:W429-32. doi:10.1093/nar/gkm256.  
1135



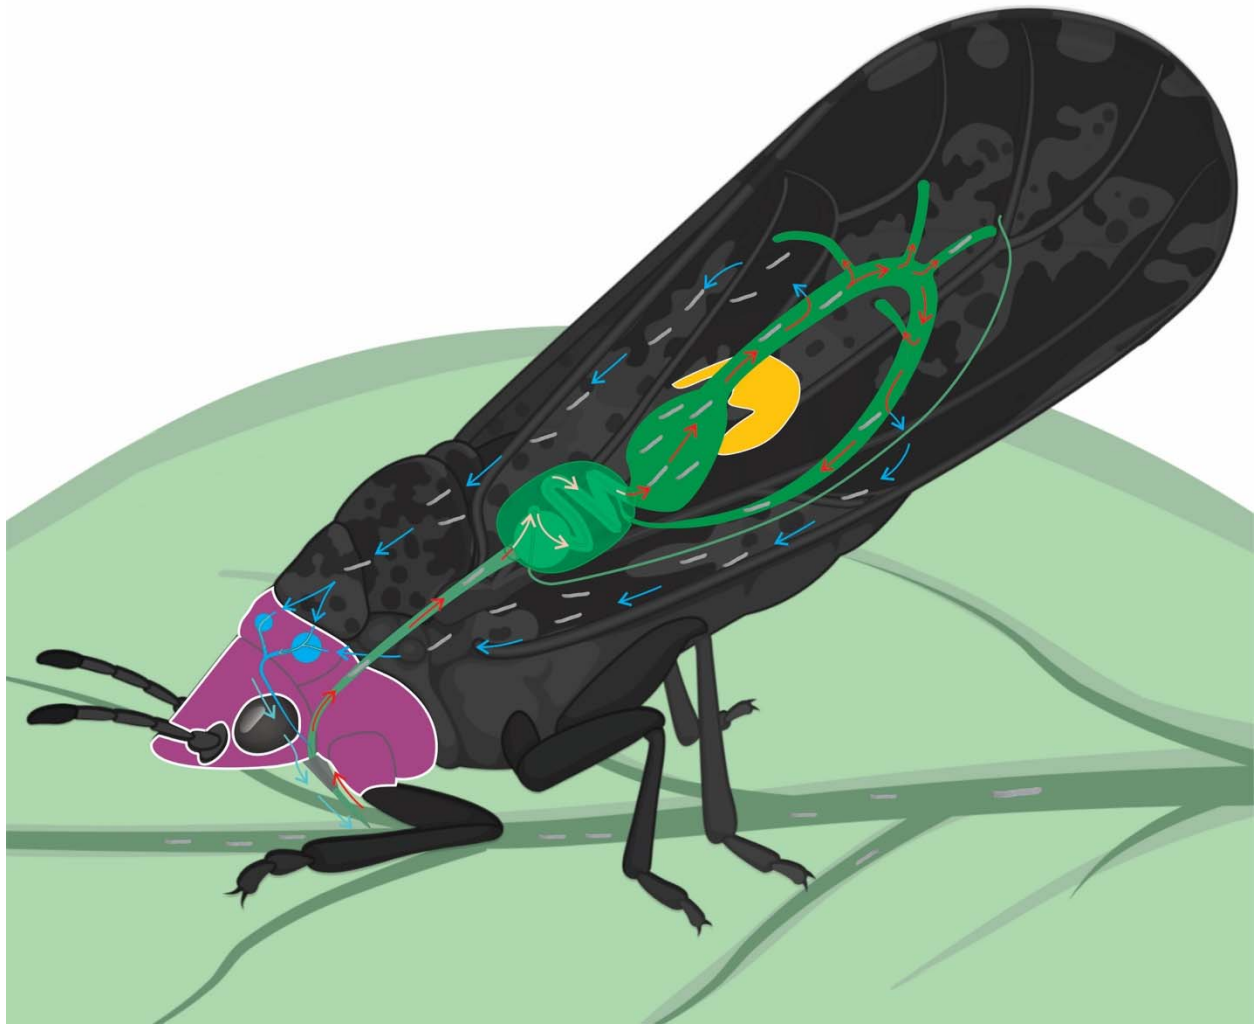

Figure 1

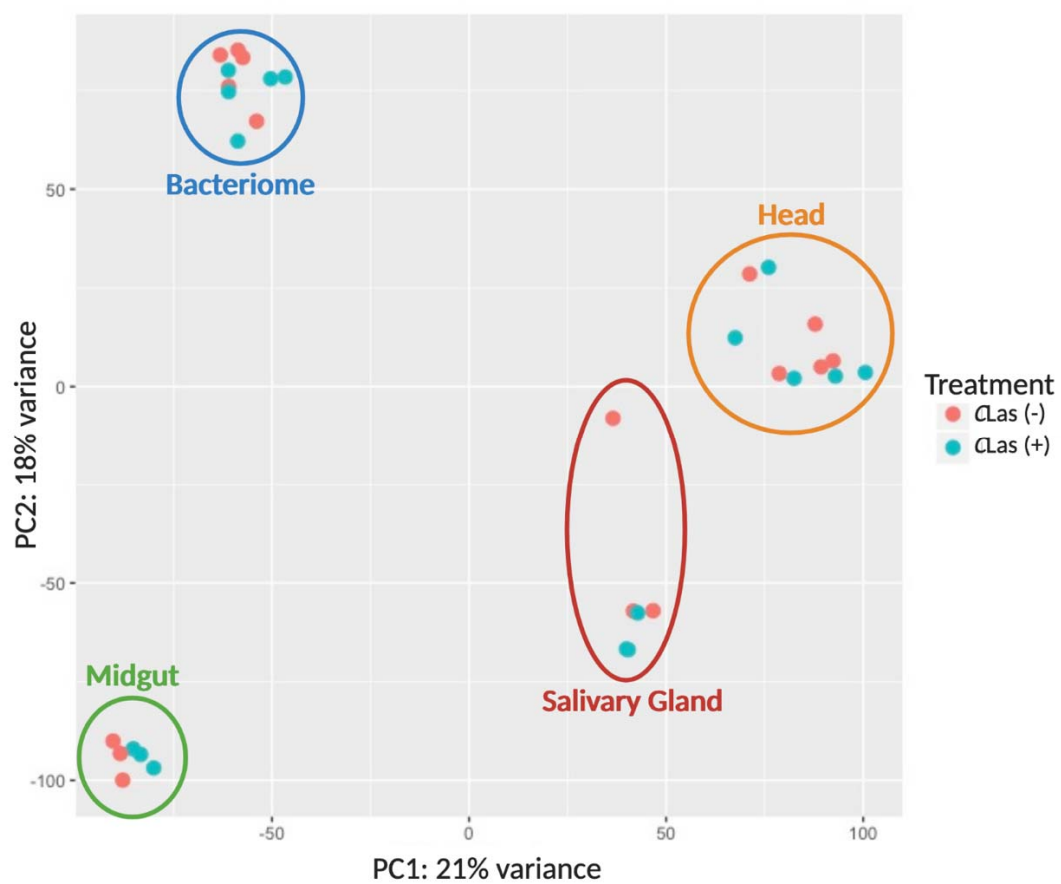

Figure 2

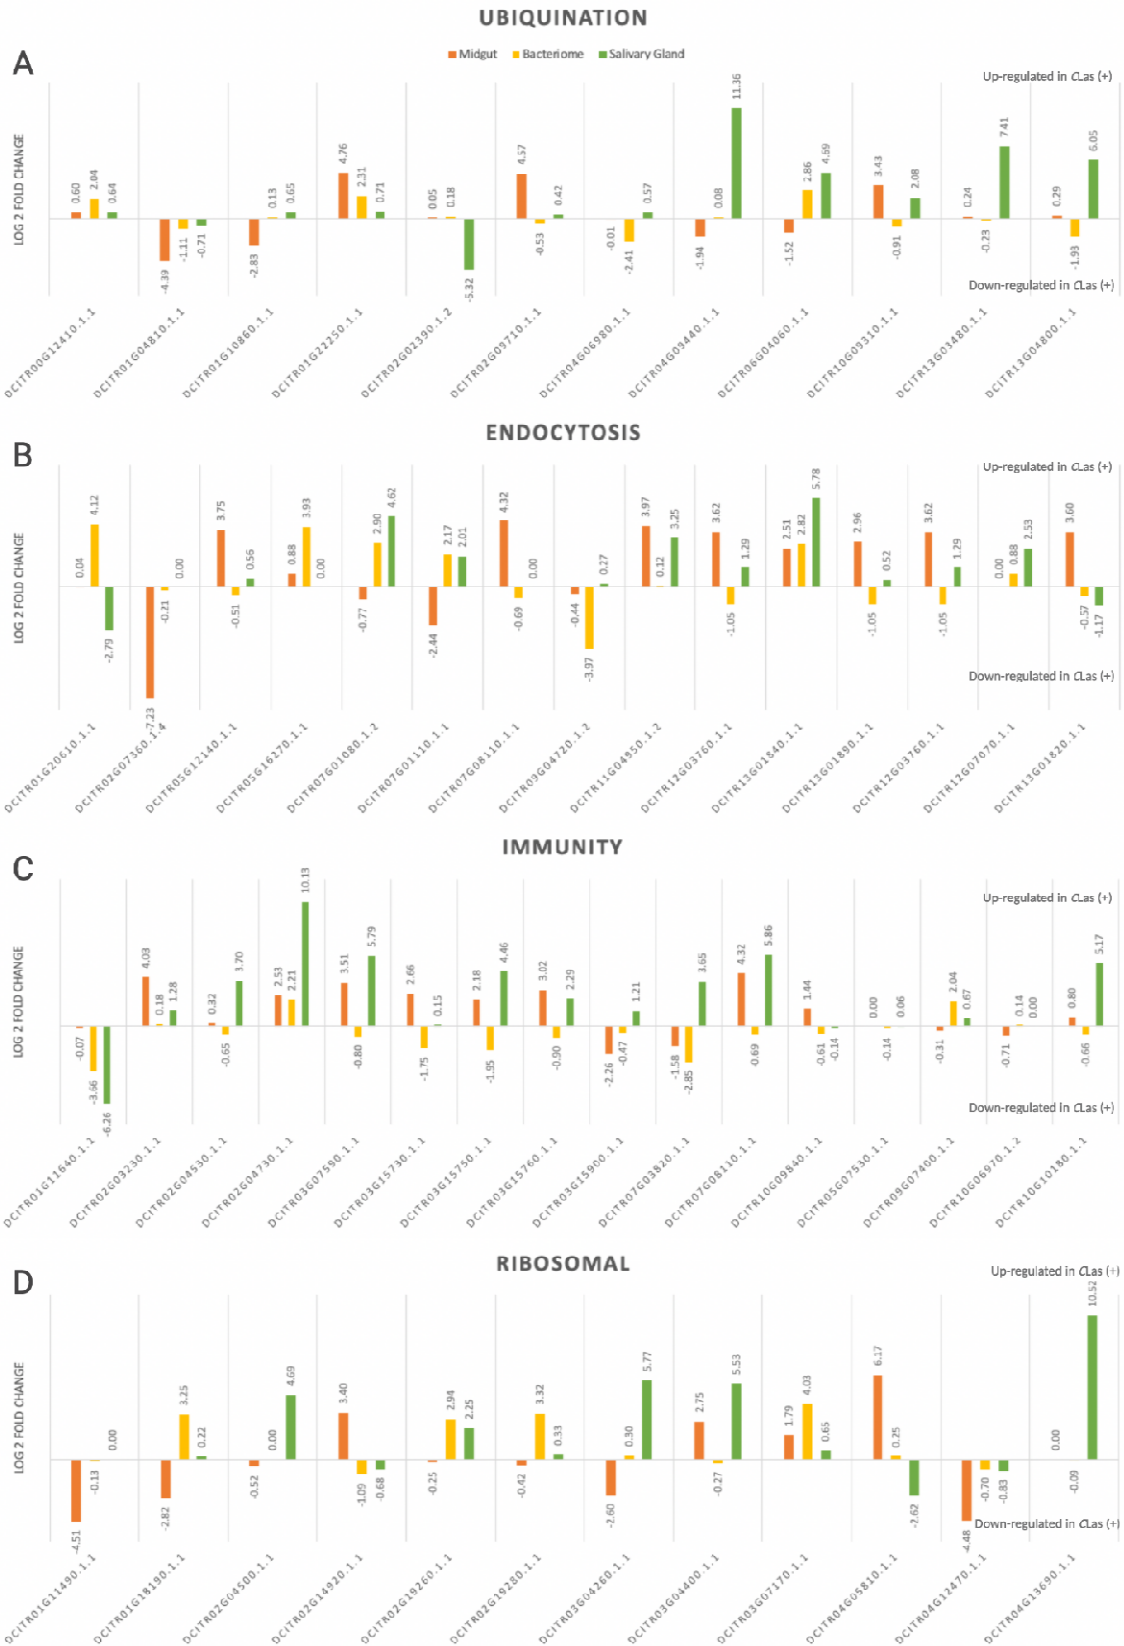

Figure 3



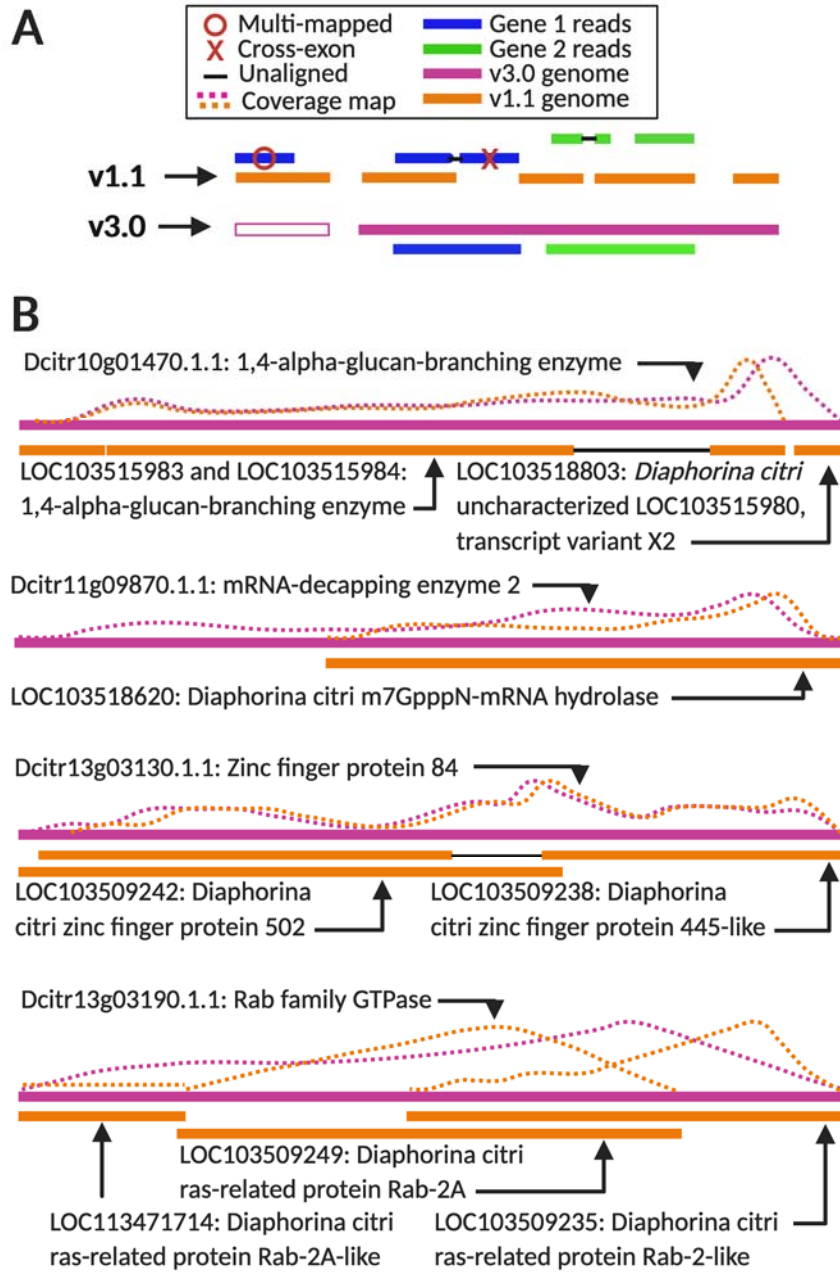

Figure 4
